# Supplementary material for: Clinical sequencing yield in epilepsy, autism spectrum disorder, and intellectual disability: A systematic review and meta‐analysis
Source: PubMed Central journal article supplement — Epilepsia. 2020 Nov 17;62(1):143–51. doi: 10.1111/epi.16755 (PMC7839709; doi:10.1111/epi.16755), 2020-11-17
Supplement: EPI-62-143-s001.pdf [file EPI-62-143-s001.pdf]

## **Supplementary material**

### **Clinical sequencing yield in epilepsy, autism spectrum disorder, and intellectual disability**

#### **A systematic review and meta-analysis**

Arthur Stefanski, Yamile Calle-Lopez, Costin Leu, Eduardo Pérez-Palma, Elia Pestana-Knight, Dennis Lal

#### **Corresponding author:**

Dennis Lal, PhD

Genomic Medicine Institute, Lerner Research Institute, Cleveland Clinic

Cleveland, OH 44195, US

Tel: +1 216 704 1519

Email: [lald@ccf.org](mailto:lald@ccf.org)

## 1. Cohorts stratified into subgroups

### 1.1. Meta analyses by disorder

|        |                                                               |     |
|--------|---------------------------------------------------------------|-----|
| 1.1.1. | Figure S1. Meta-analysis of the diagnostic yield by disorder  | 4-6 |
| 1.1.2. | Figure S2. Funnel plot of all ASD studies                     | 7   |
| 1.1.3. | Figure S3. Funnel plot of all epilepsy studies                | 7   |
| 1.1.4. | Figure S4. Funnel plot of all ID studies                      | 8   |
| 1.1.5. | Figure S5. Error bar plot of the diagnostic yield by disorder | 8   |

### 1.2. Meta analyses by disorder subtype

|         |                                                                       |       |
|---------|-----------------------------------------------------------------------|-------|
| 1.2.1.  | Figure S6. Meta-analysis of the diagnostic yield by seizure type      | 9-10  |
| 1.2.2.  | Figure S7. Funnel plot of all FE studies                              | 11    |
| 1.2.3.  | Figure S8. Funnel plot of all GE studies                              | 11    |
| 1.2.4.  | Figure S9. Funnel plot of all GE&FE studies                           | 12    |
| 1.2.5.  | Figure S10. Meta-analysis of the diagnostic yield by disorder subtype | 13    |
| 1.2.6.  | Figure S11. Funnel plot of all epilepsy without ID studies            | 14    |
| 1.2.7.  | Figure S12. Funnel plot of all ASD with ID or DD studies              | 14    |
| 1.2.8.  | Figure S13. Funnel plot of all epilepsy with ID studies               | 15    |
| 1.2.9.  | Figure S14. Meta-analysis of the diagnostic yield by DEE              | 16-17 |
| 1.2.10. | Figure S15. Funnel plot of all WS studies                             | 17    |
| 1.2.11. | Figure S16. Funnel plot of all other DEE studies                      | 18    |
| 1.2.12. | Figure S17. Error bar plot of the diagnostic yield by subtype         | 18    |

### 1.3. Meta analyses by sequencing technology

|        |                                                                              |       |
|--------|------------------------------------------------------------------------------|-------|
| 1.3.1. | Figure S18. Meta-analysis of the diagnostic yield of sequencing technologies | 19-21 |
| 1.3.2. | Figure S19. Funnel plot over all Panel studies                               | 21    |
| 1.3.3. | Figure S20. Funnel plot over all ES studies                                  | 22    |
| 1.3.4. | Figure S21. Error bar plot of the diagnostic yield by sequencing technology  | 22    |

### 1.4. Meta analyses by age of onset

|        |                                                                                           |    |
|--------|-------------------------------------------------------------------------------------------|----|
| 1.4.1. | Figure S22. Meta-analysis of the diagnostic yield of all epilepsy studies by age of onset | 23 |
| 1.4.2. | Figure S23. Funnel plot of all Neonatal/Infantile studies                                 | 24 |
| 1.4.3. | Figure S24. Funnel plot of all Childhood studies                                          | 24 |
| 1.4.4. | Figure S25. Funnel plot of all Any Age studies                                            | 25 |

|                                                                                                                                                |       |
|------------------------------------------------------------------------------------------------------------------------------------------------|-------|
| <b>2. Reported genes</b>                                                                                                                       |       |
| 2.1. Figure S26. Number and rate of genes with pathogenic variant                                                                              | 26    |
| <b>3. Variant interpretation, VUS, and benign variants</b>                                                                                     |       |
| 3.1. Figure S27. Level of variant interpretation and reporting as well as the proportion of the studies which reported VUS and benign variants | 27    |
| <b>4. References of all studies included in meta-analysis</b>                                                                                  |       |
| 4.1. Table S1. List of all 103 studies                                                                                                         | 28-35 |

# 1. Cohorts stratified into subgroups

## 1.1. By disorder

### 1.1.1. Figure S1. Meta-analysis of the diagnostic yield by disorder

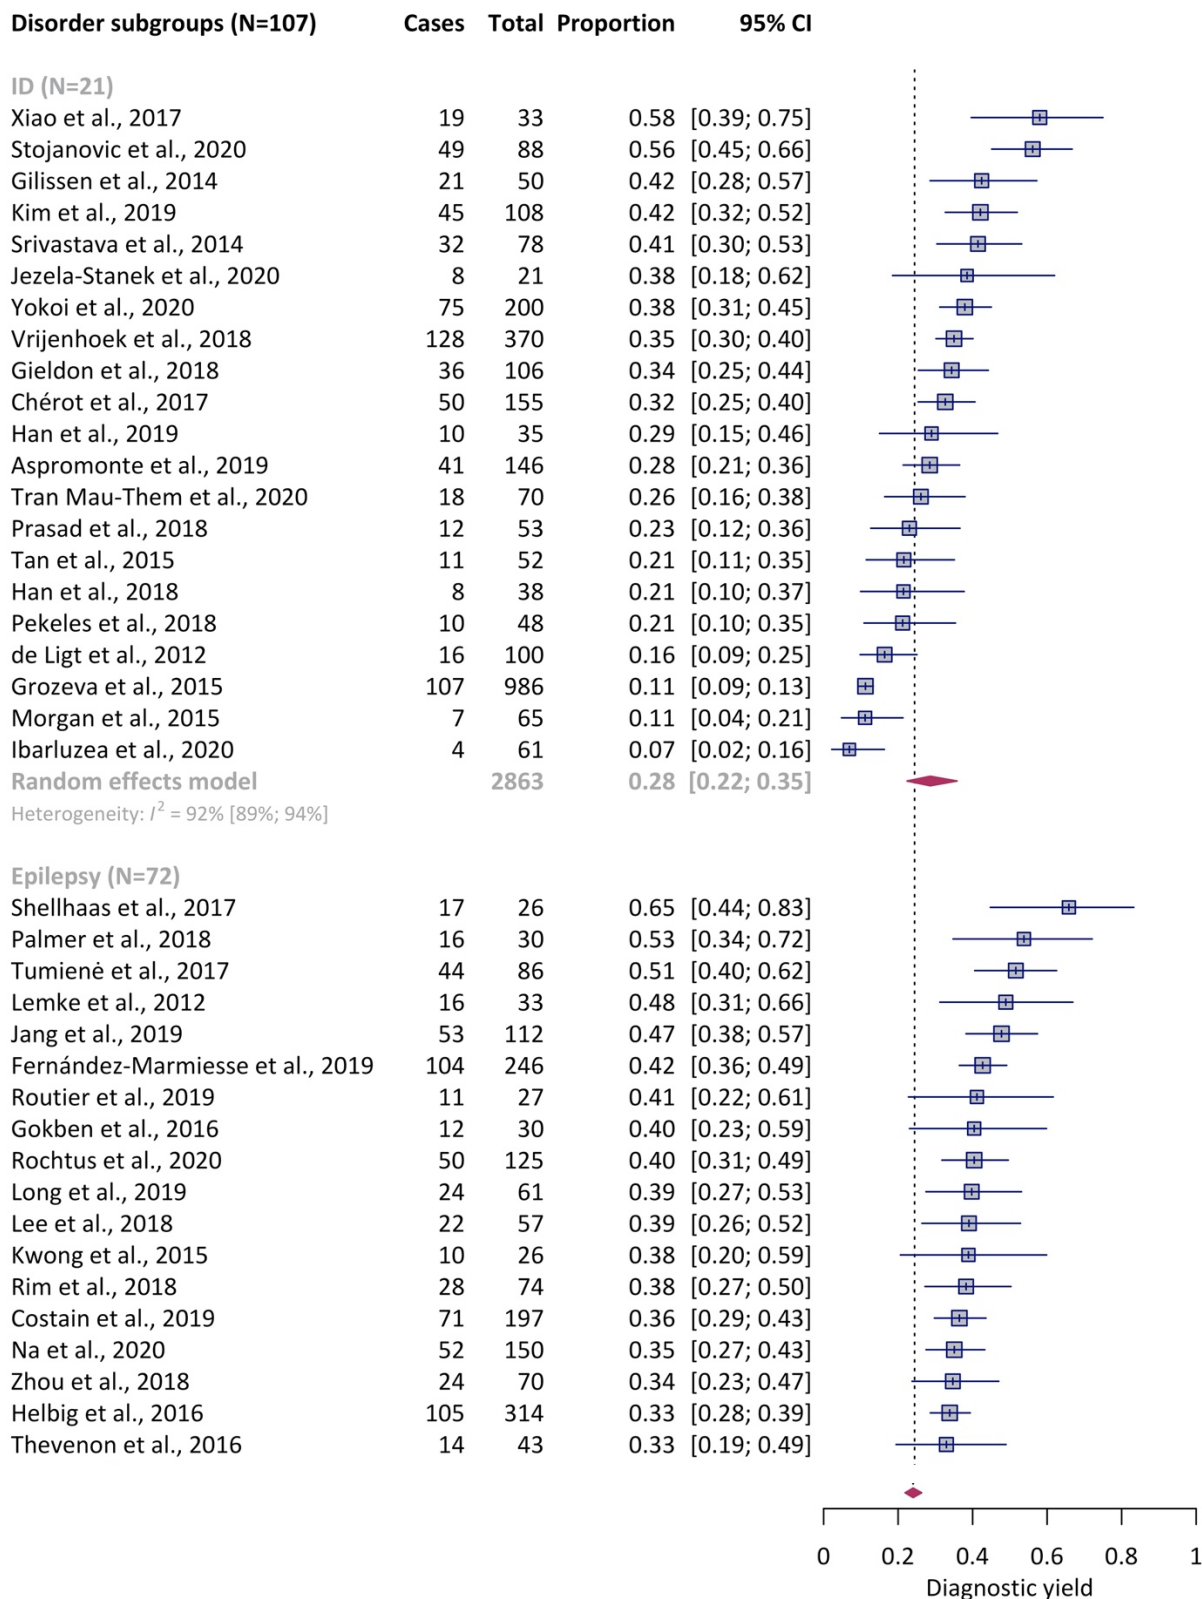

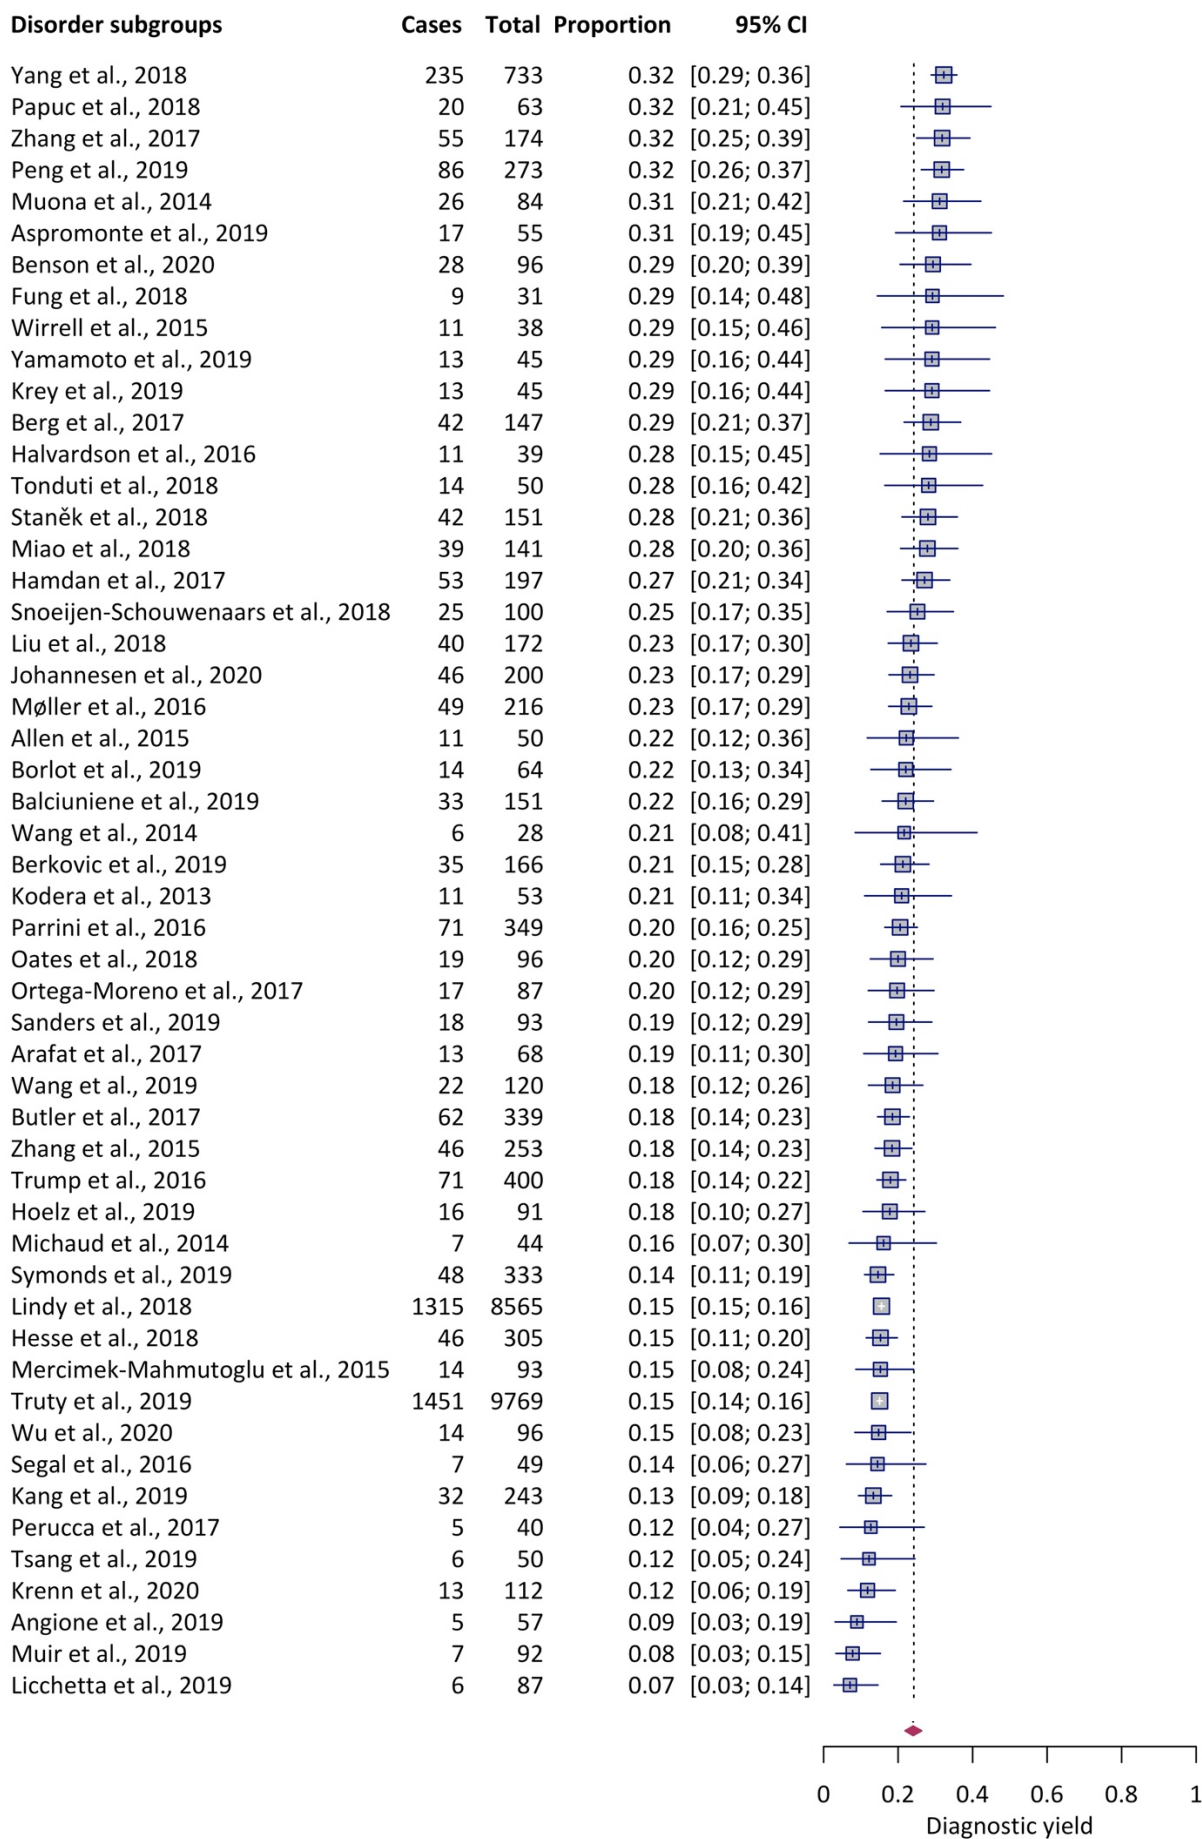

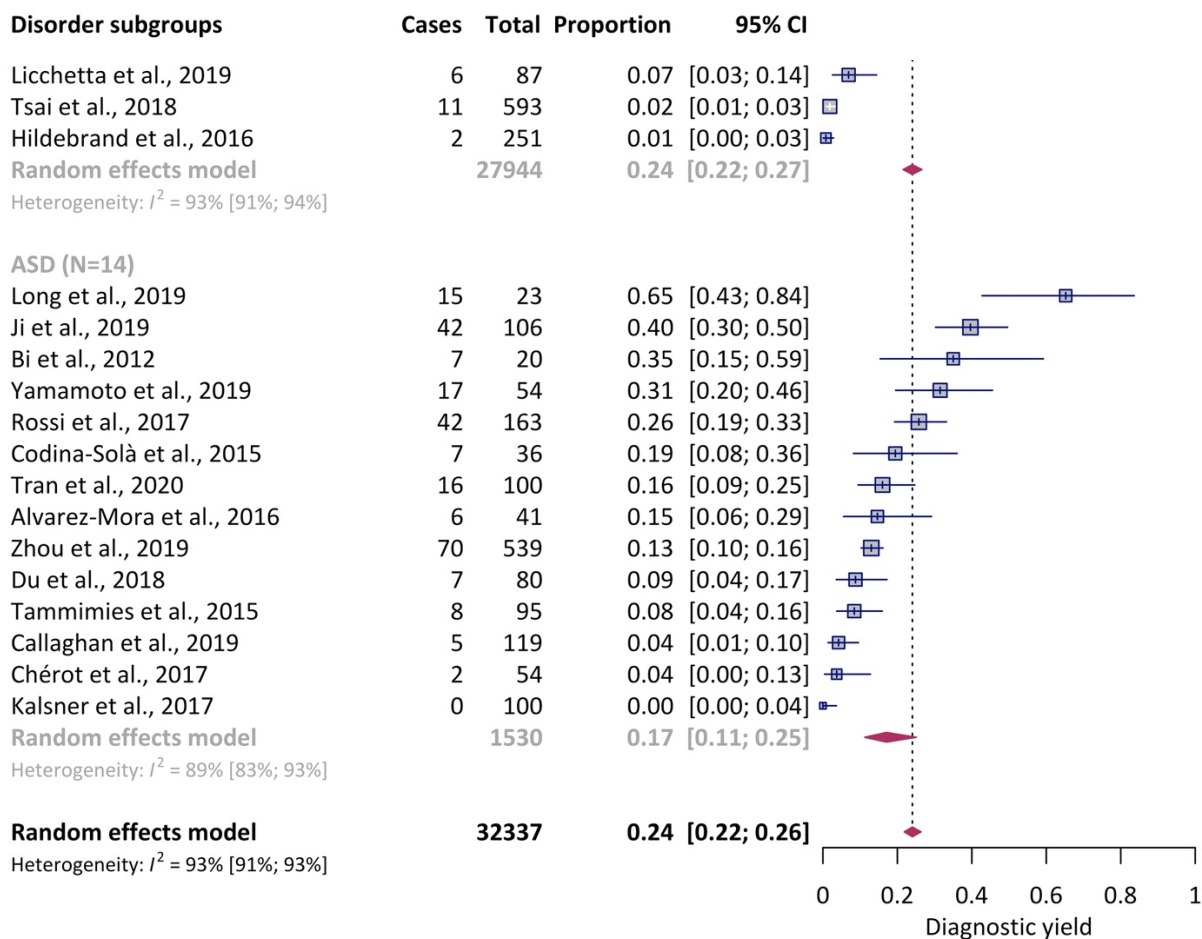

Abbreviations: *CI* = confidence interval,  $I^2$  = estimated proportion of the variance in study estimates that is due to heterogeneity, *Proportion* = fraction of individuals with a positive genetic test, i.e. pathogenic or likely pathogenic variant.

1.1.2. Figure S2. Funnel plot of all ASD studies

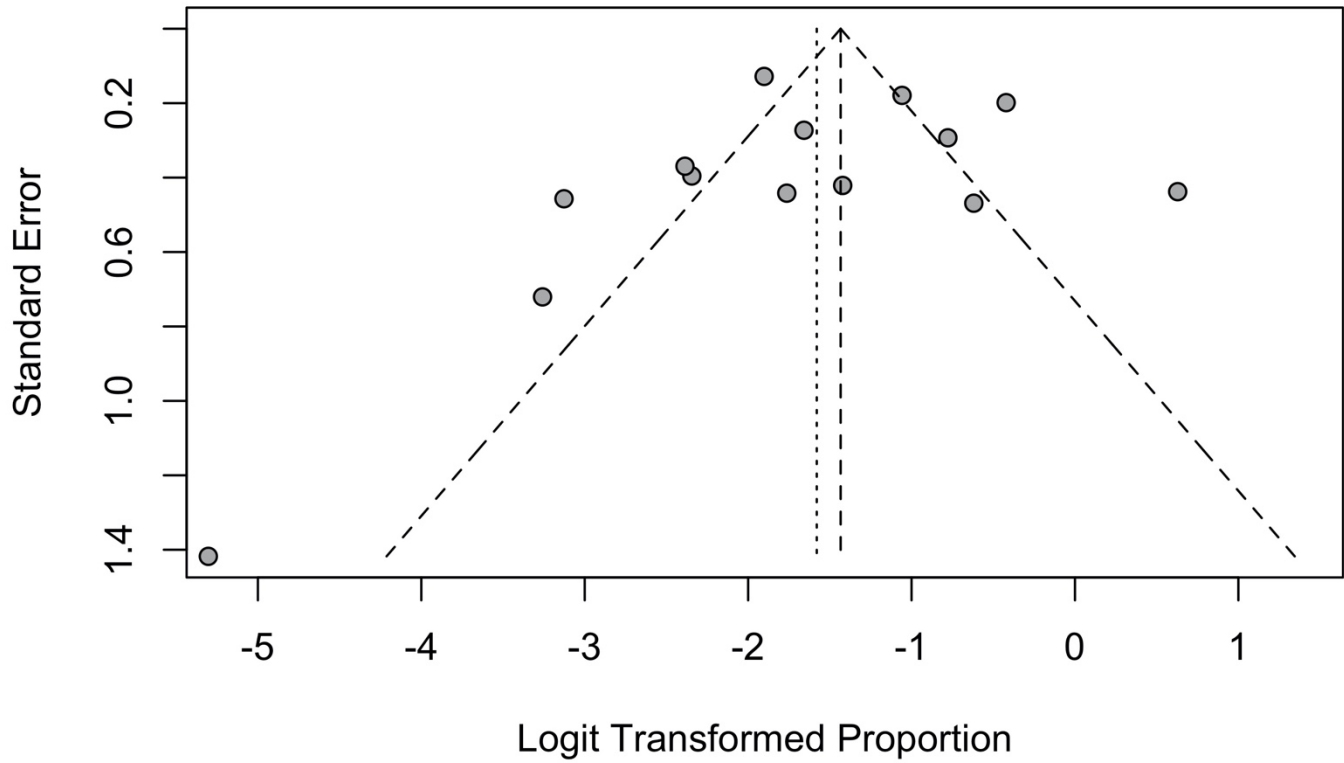

*Grey dots = Original studies.*

1.1.3. Figure S3. Funnel plot of all epilepsy studies

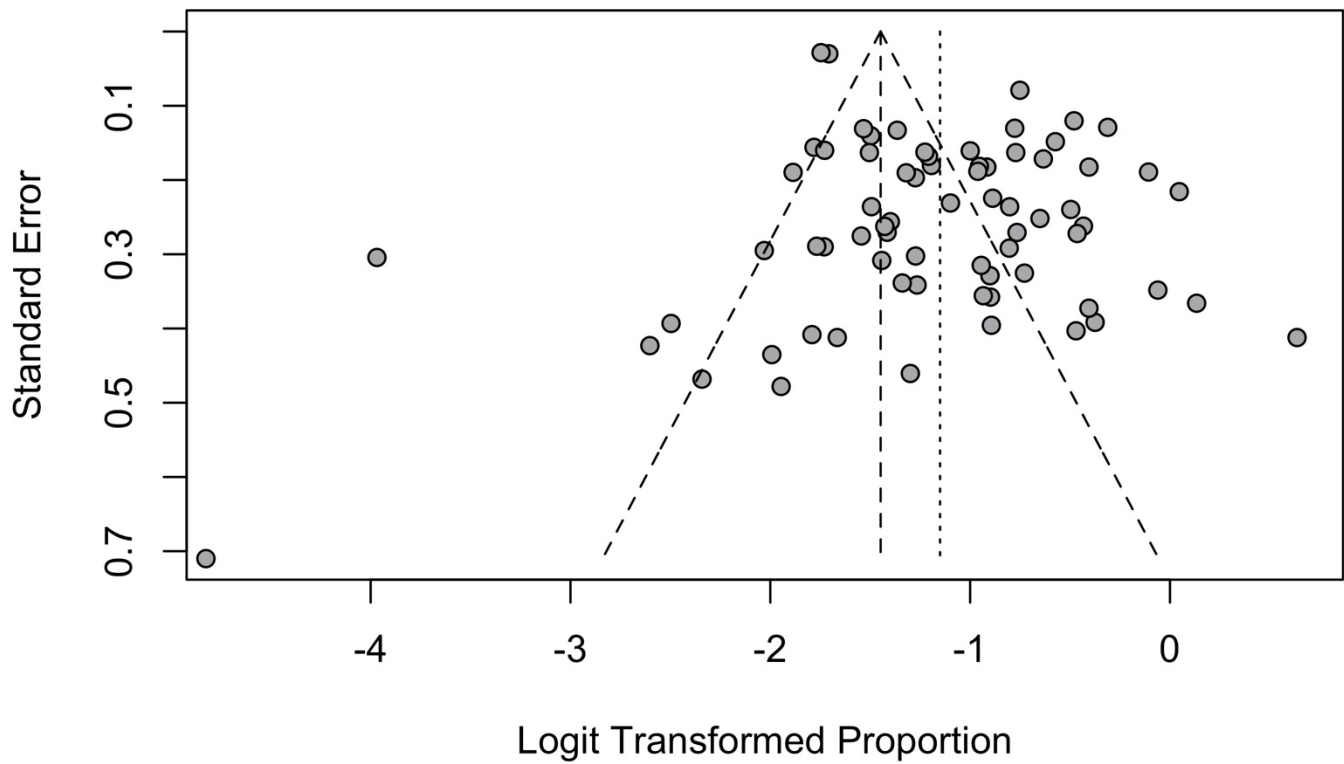

*Grey dots = Original studies.*

1.1.4. Figure S4. Funnel plot of all ID studies

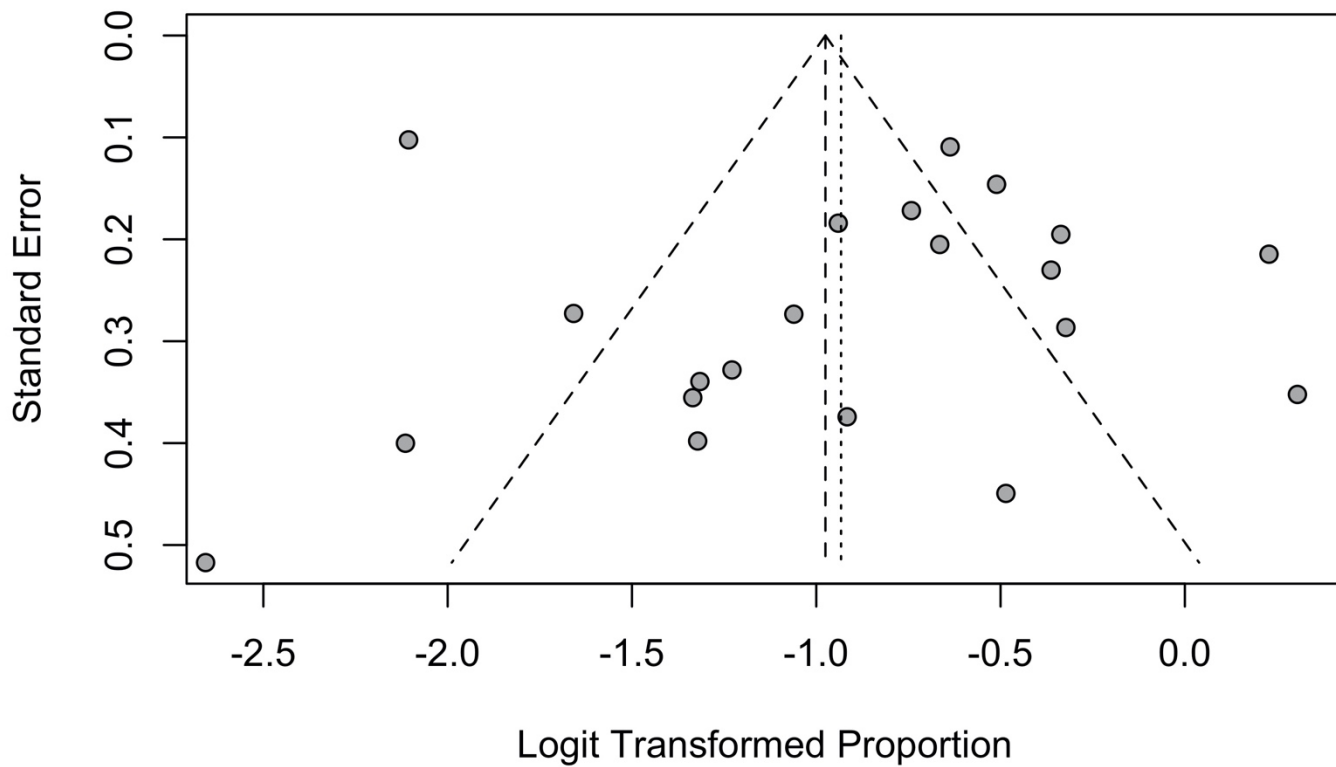

*Grey dots = Original studies.*

1.1.5. Figure S5. Error bar plot of the diagnostic yield by disorder

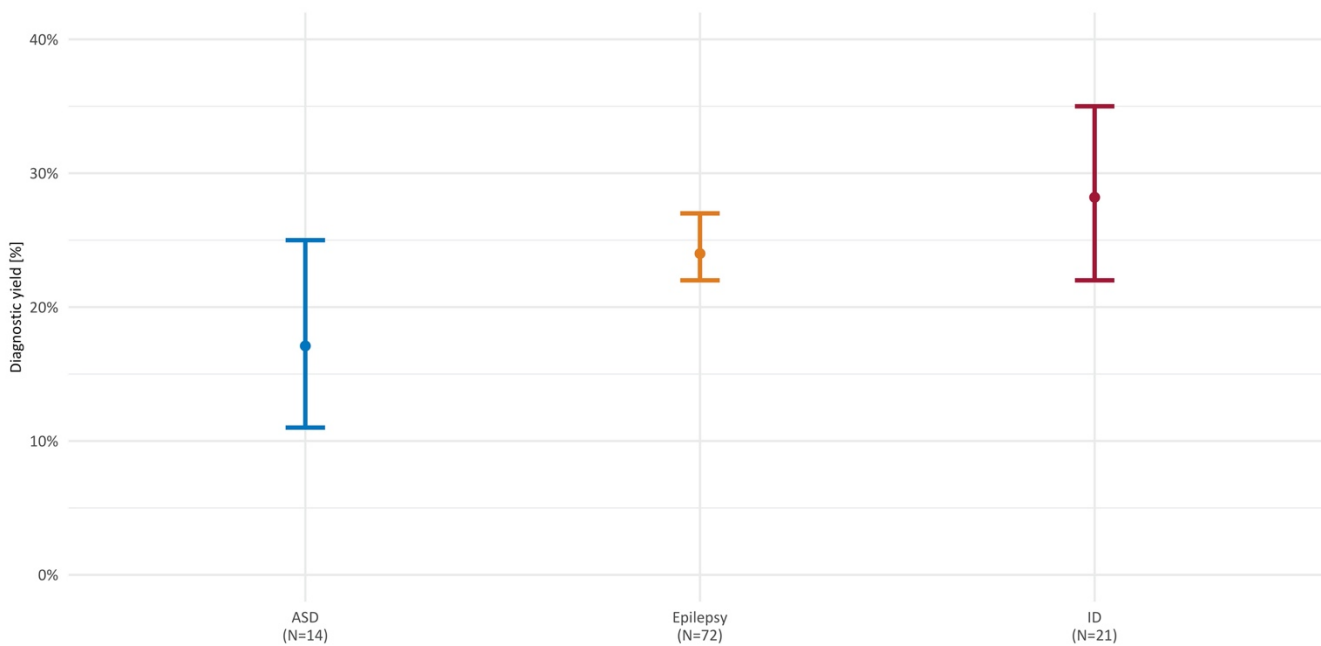

*Abbreviations: ASD = autism spectrum disorder, ID = intellectual disability.*



## 1.2. Meta analyses by disorder subtype

### 1.2.1. Figure S6. Meta-analysis of the diagnostic yield by seizure type

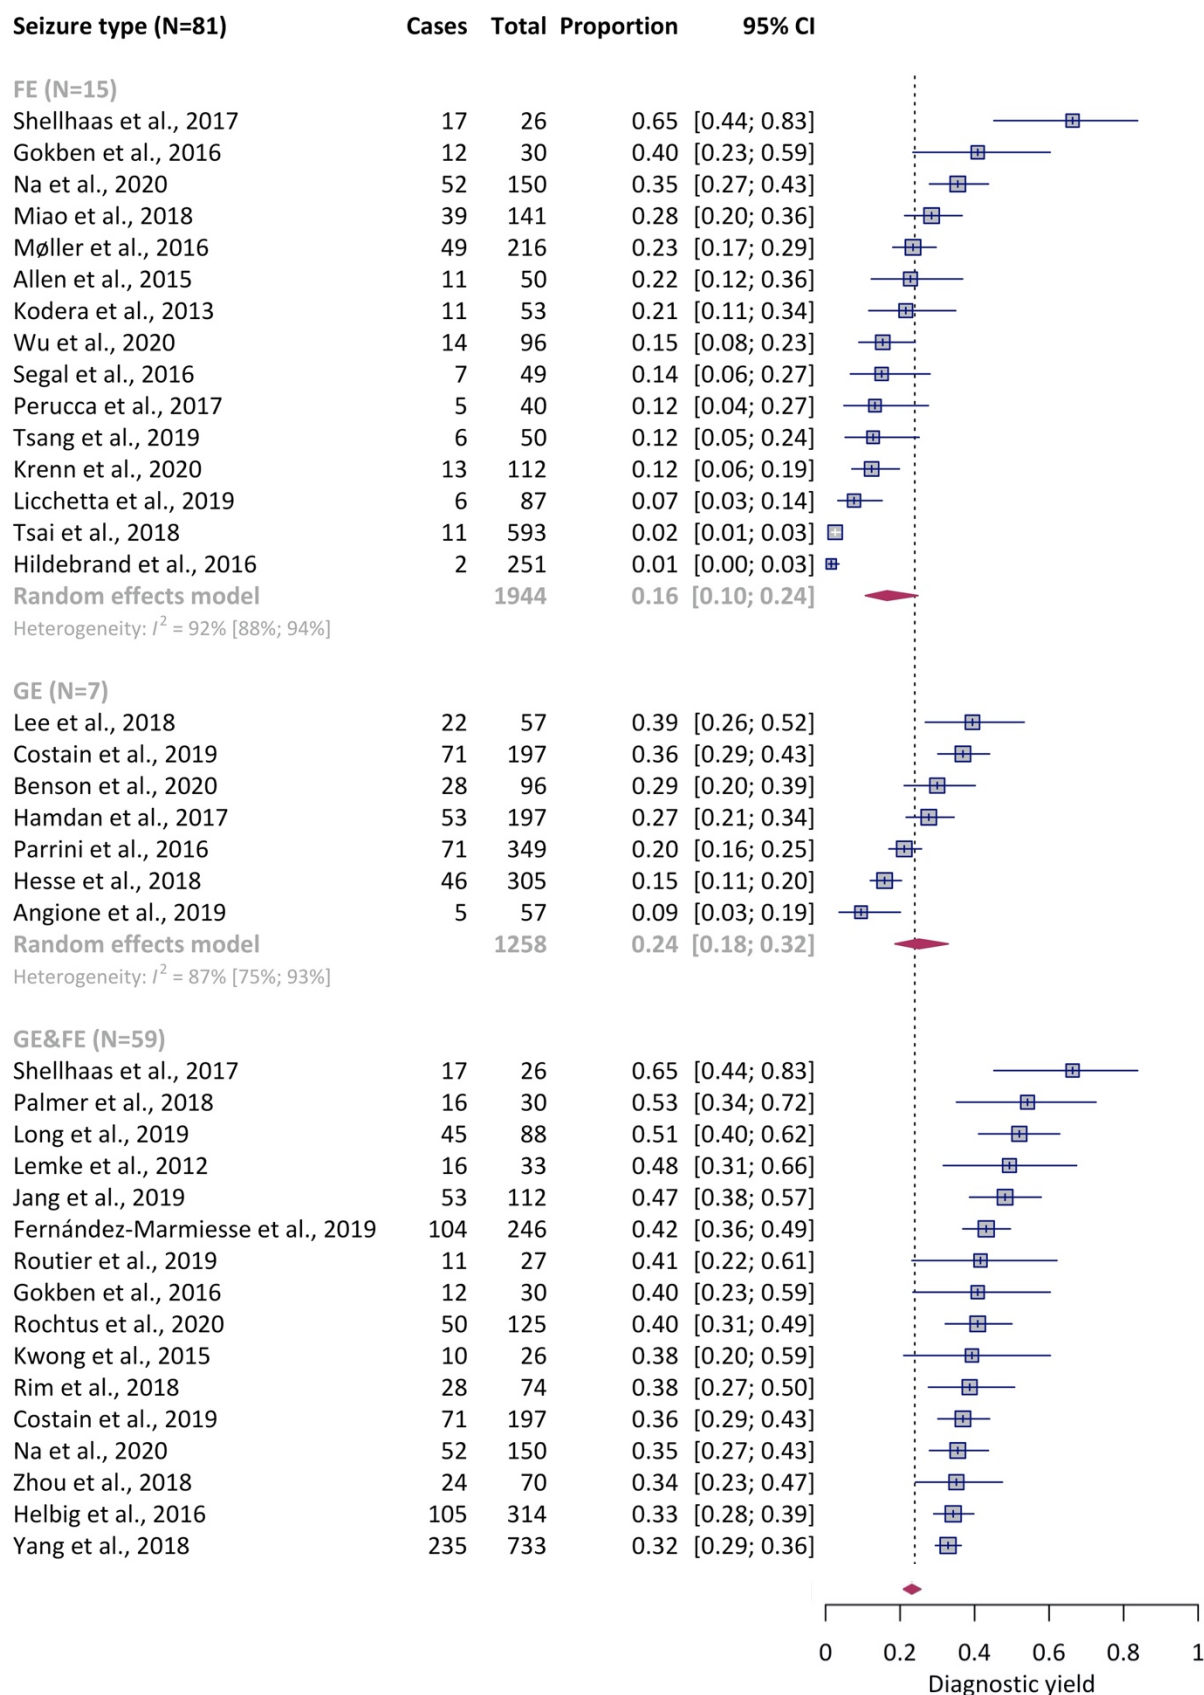

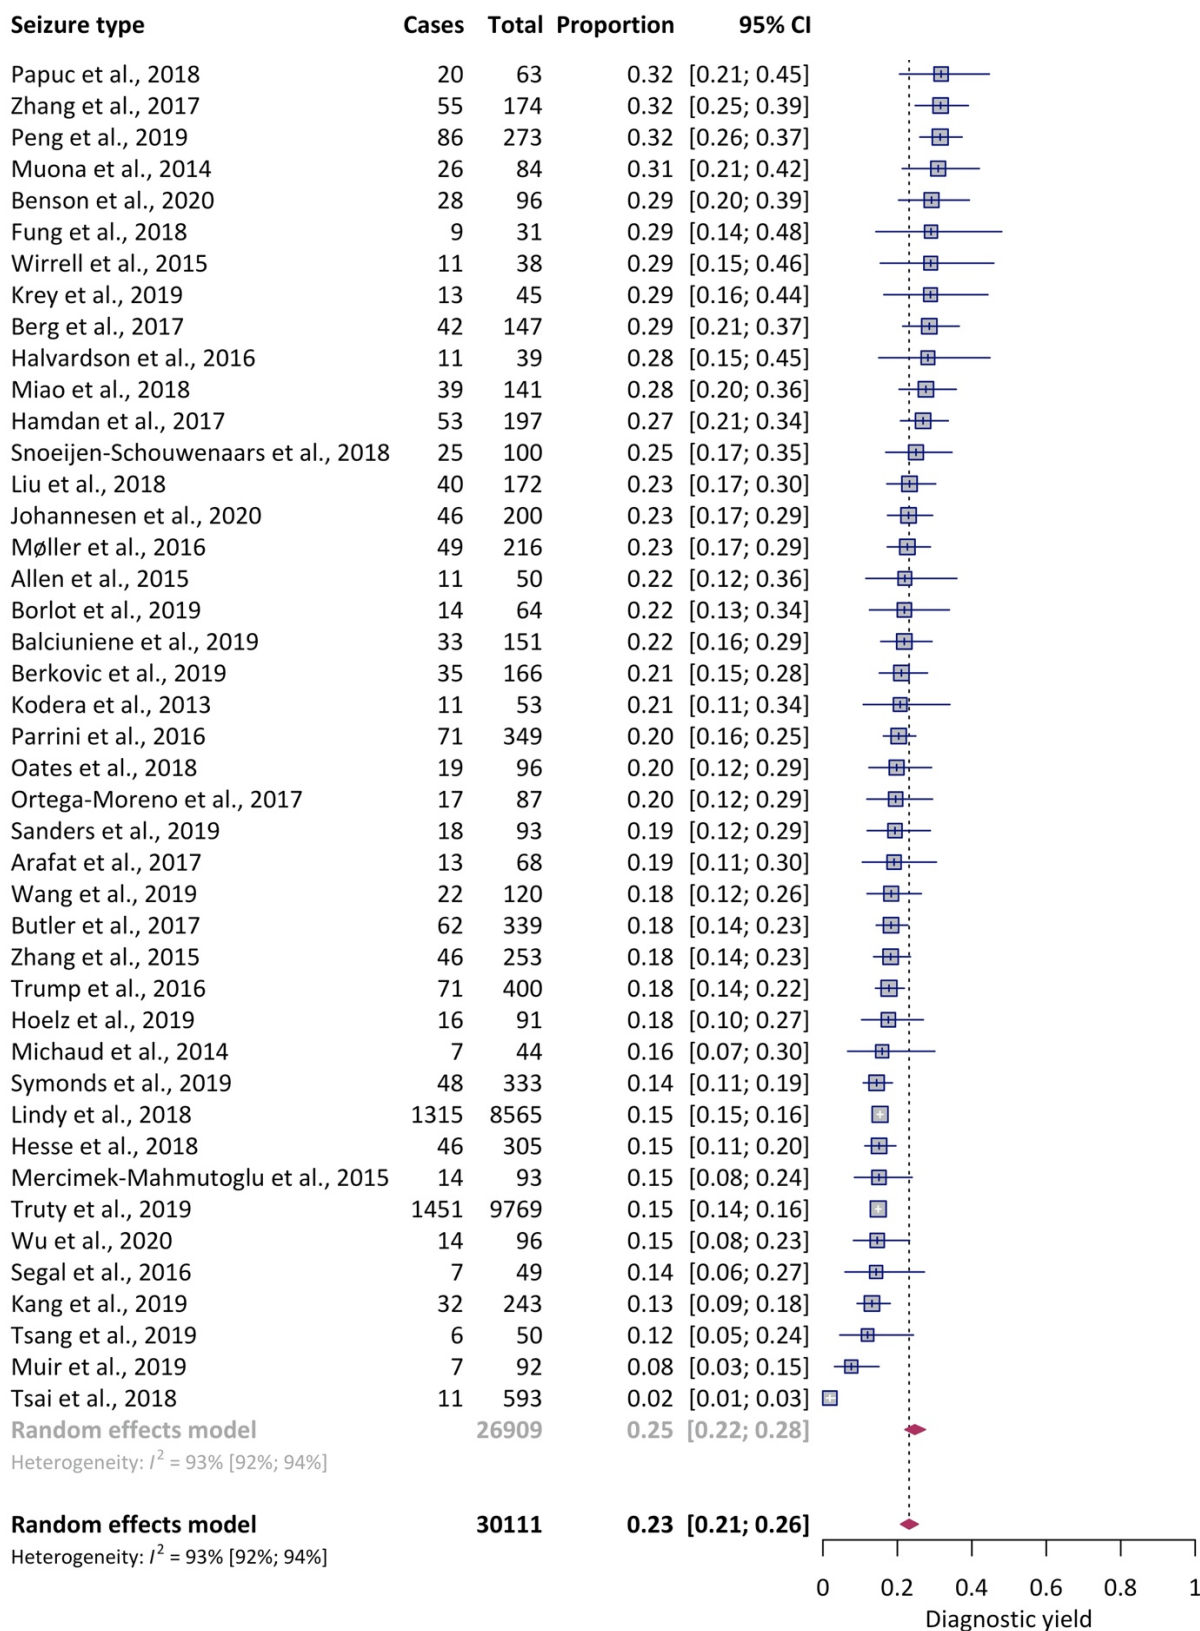

Abbreviations: CI = confidence interval,  $I^2$  = estimated proportion of the variance in study estimates that is due to heterogeneity, Proportion = fraction of individuals with a positive genetic test, i.e. pathogenic or likely pathogenic variant.

1.2.2. Figure S7. Funnel plot of all FE studies

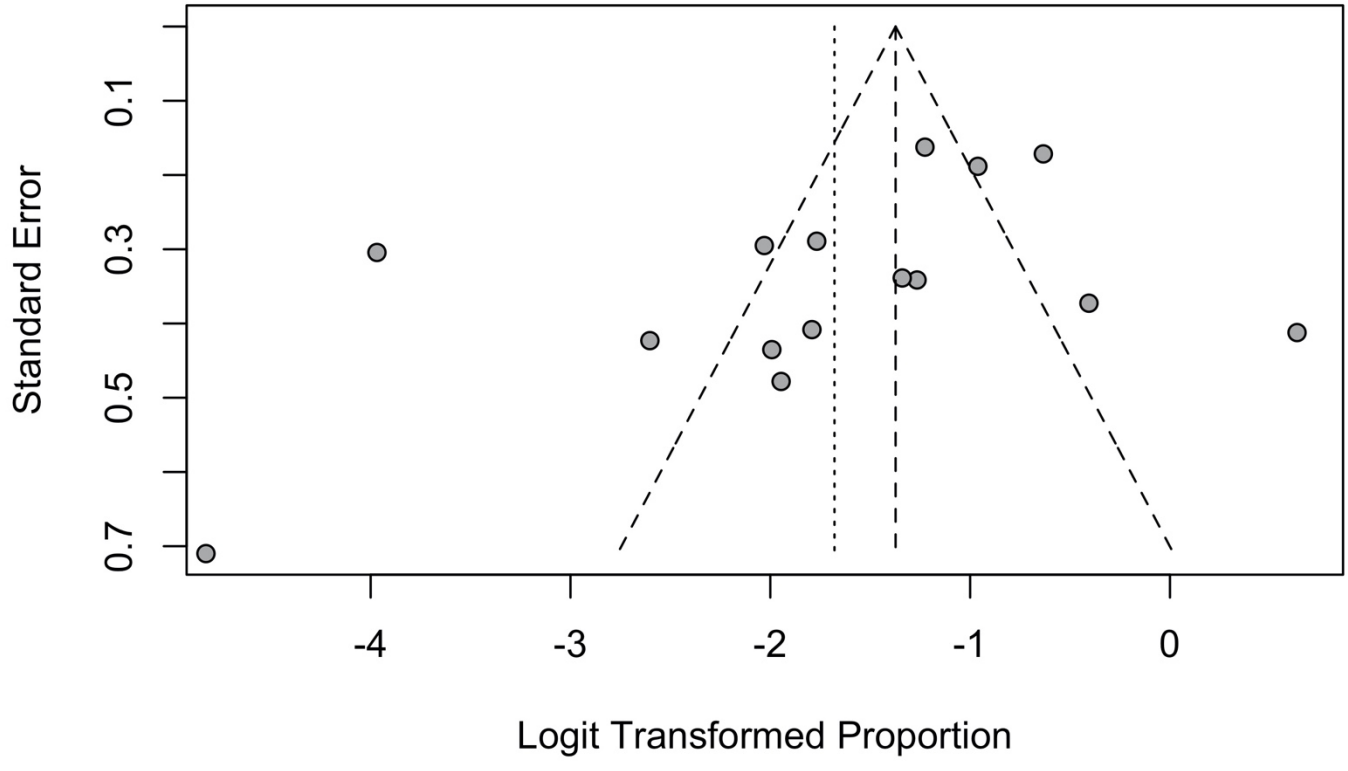

Grey dots = Original studies.

1.2.3. Figure S8. Funnel plot of all GE studies

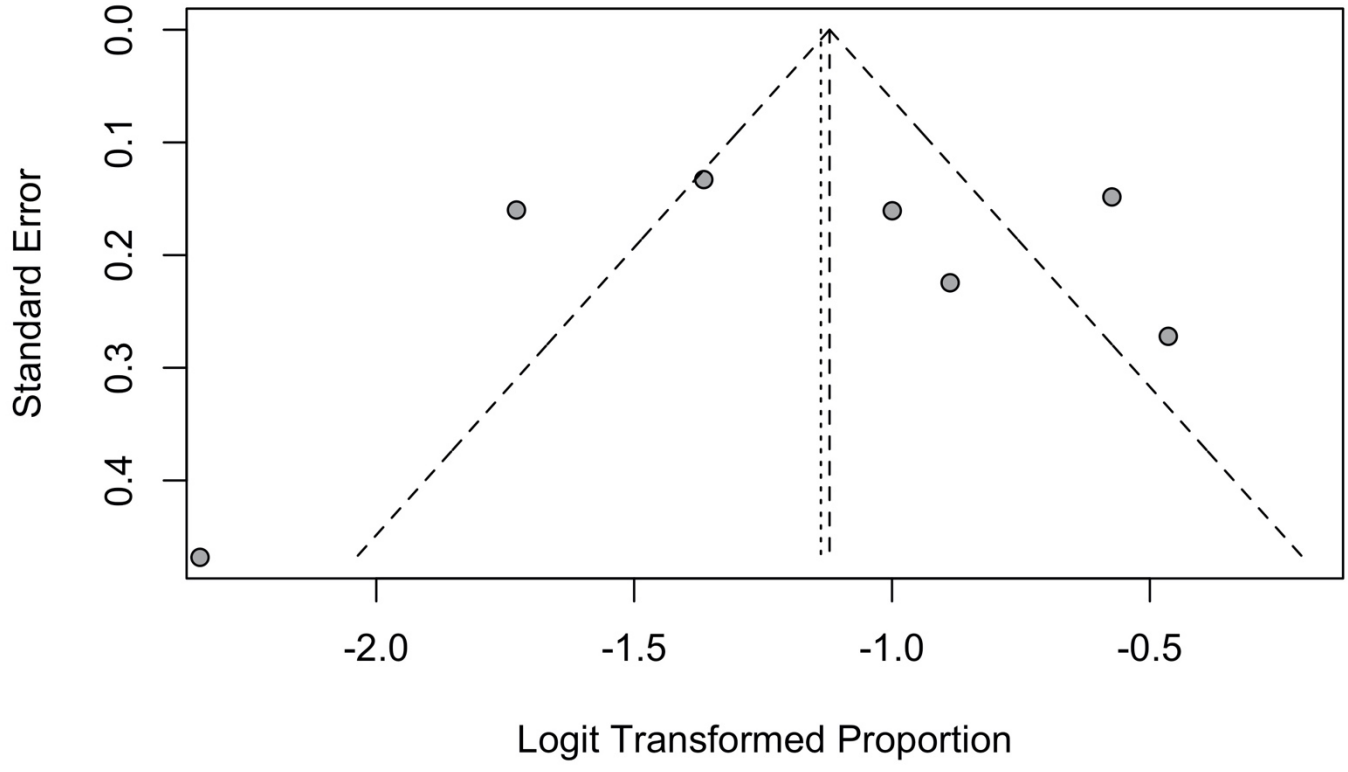

Grey dots = Original studies.

1.2.4. Figure S9. Funnel plot of all GE&amp;FE studies

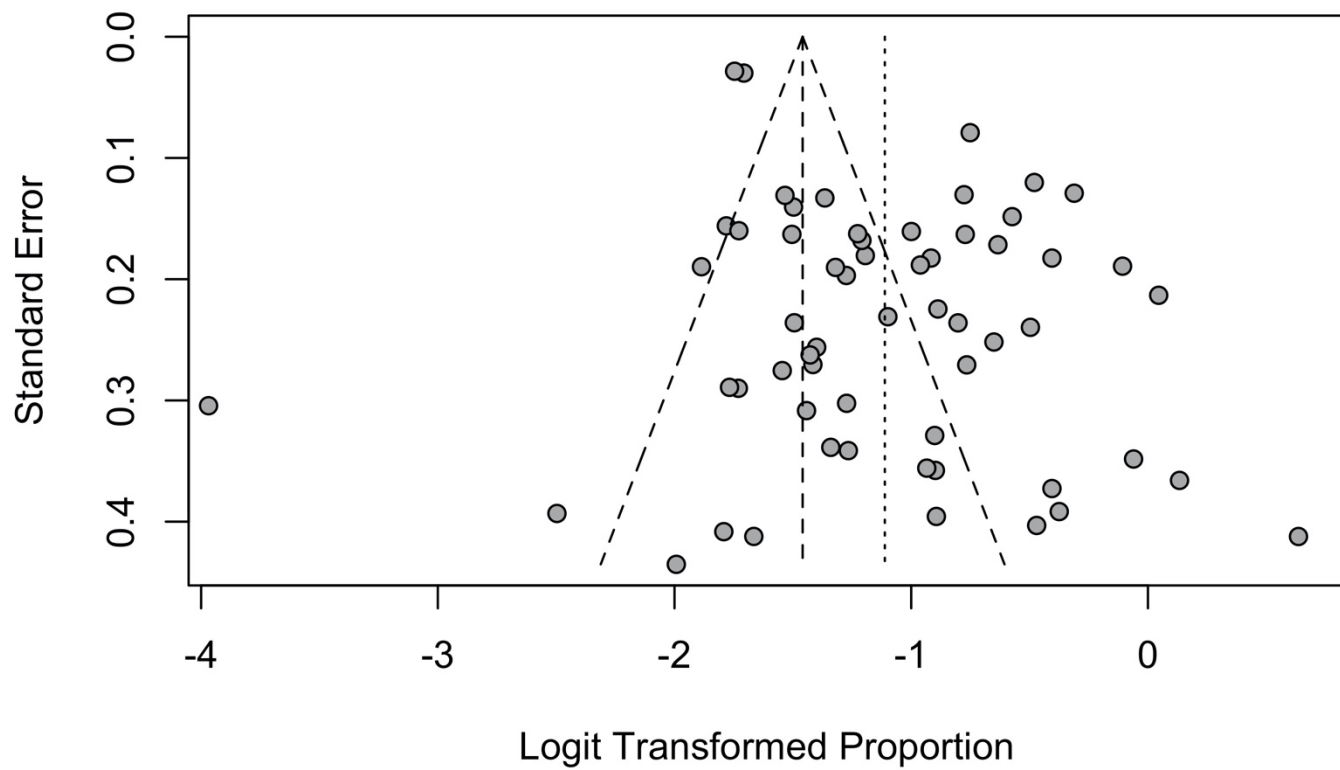

*Grey dots = Original studies.*

## 1.2.5. Figure S10. Meta-analysis of the diagnostic yield by disorder subtype

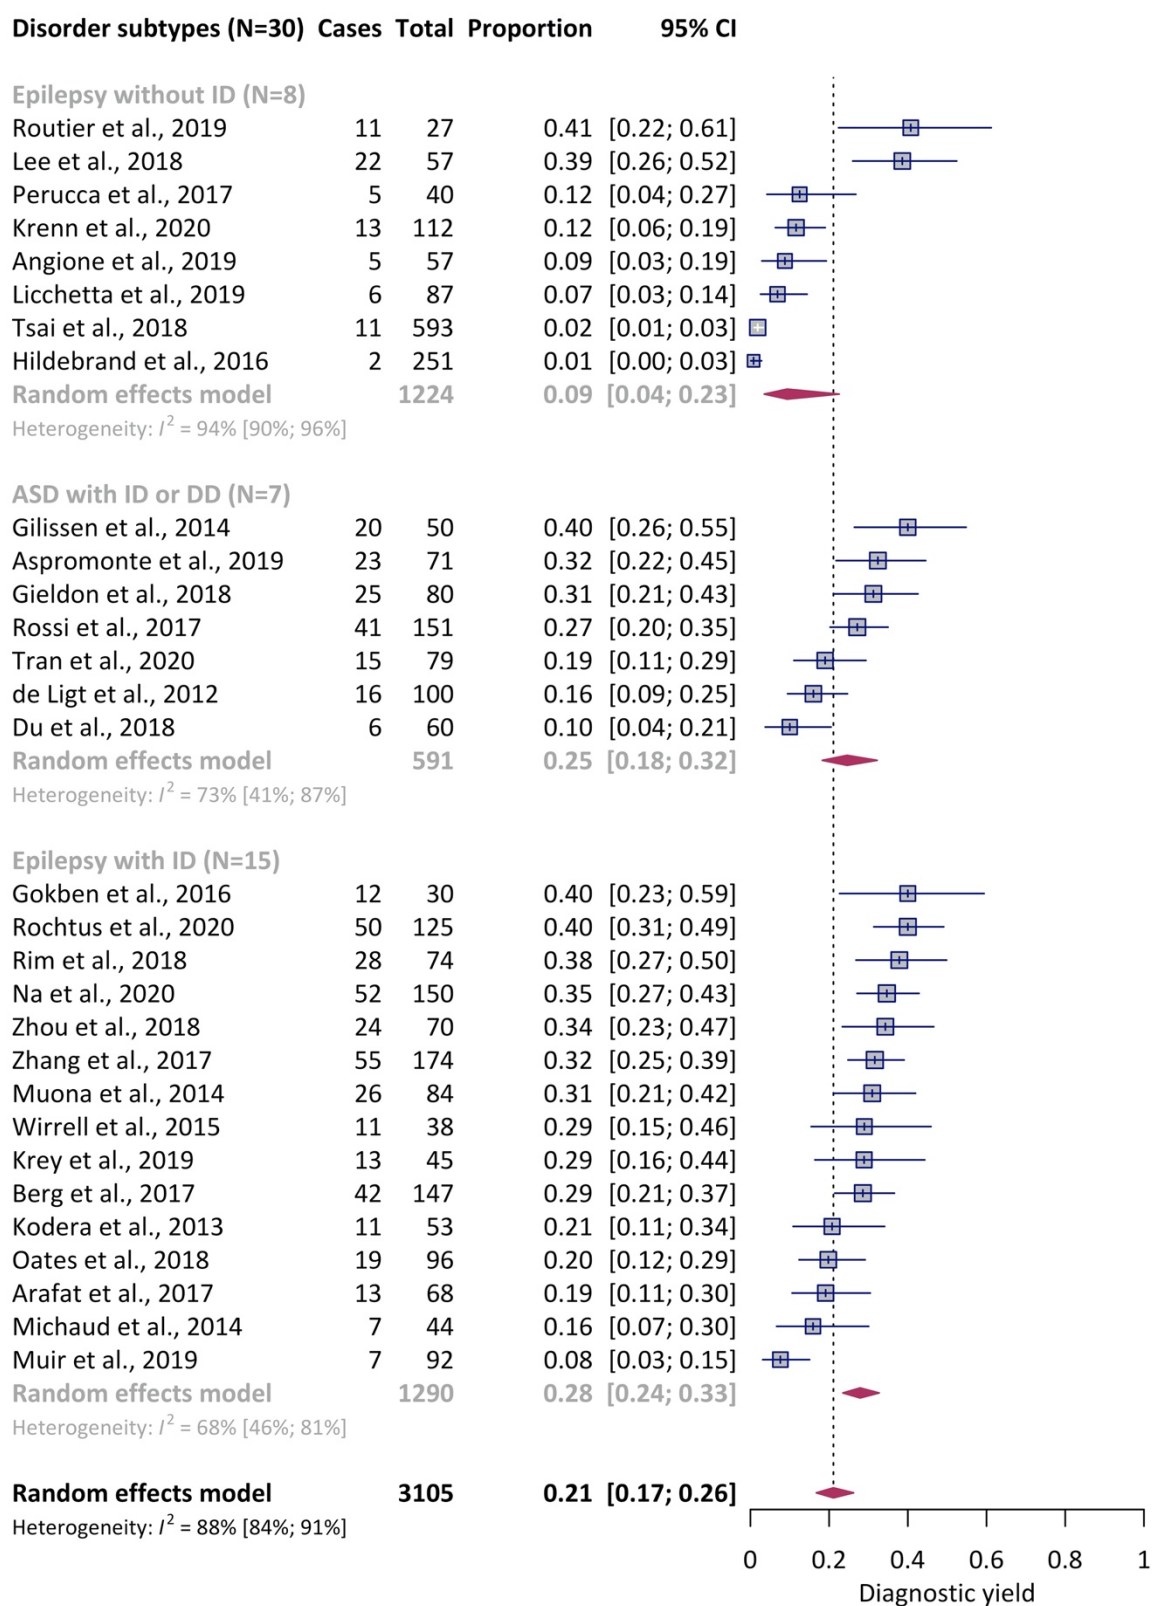

Abbreviations: ID = intellectual disability, CI = confidence interval,  $I^2$  = estimated proportion of the variance in study estimates that is due to heterogeneity, Proportion = fraction of individuals with a positive genetic test, i.e. pathogenic or likely pathogenic variant.

1.2.6. Figure S11. Funnel plot of all epilepsy without ID studies

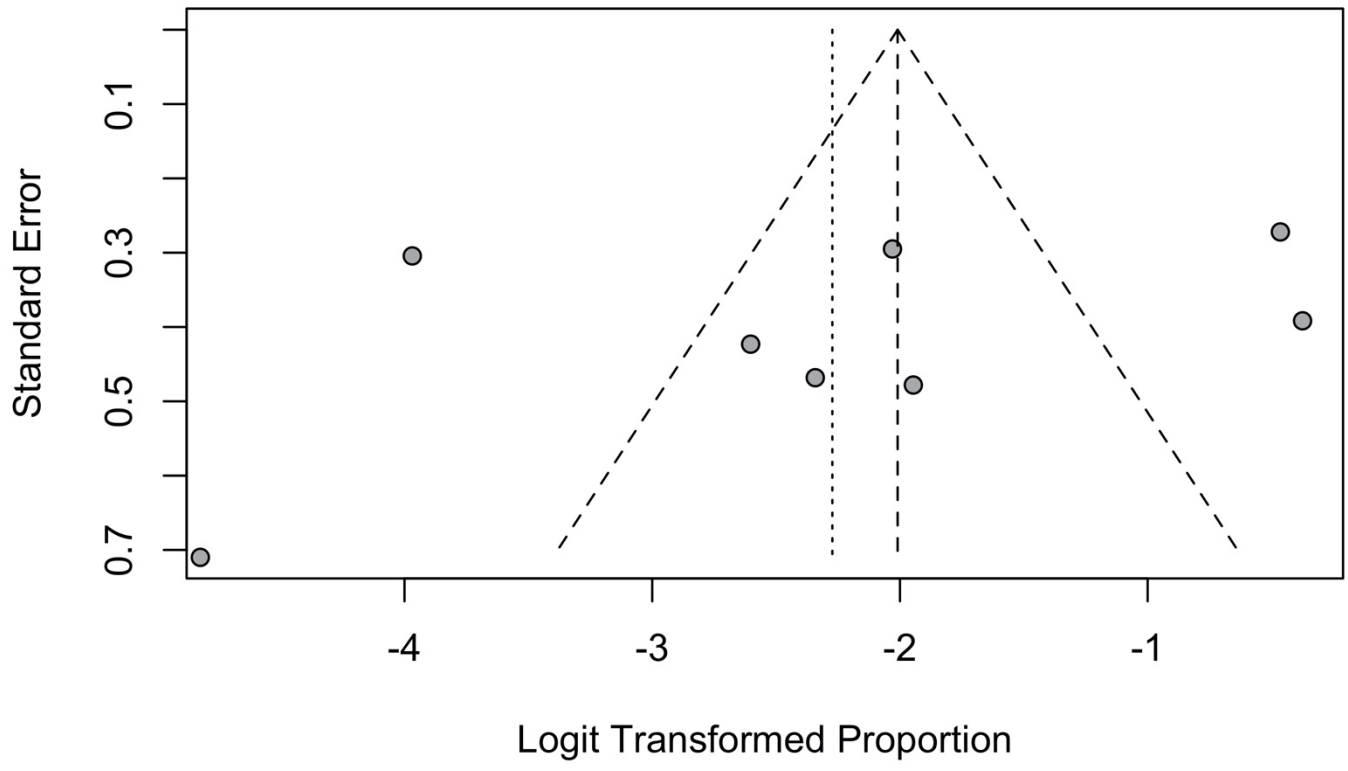

Grey dots = Original studies.

1.2.7. Figure S12. Funnel plot of all ASD with ID or DD studies

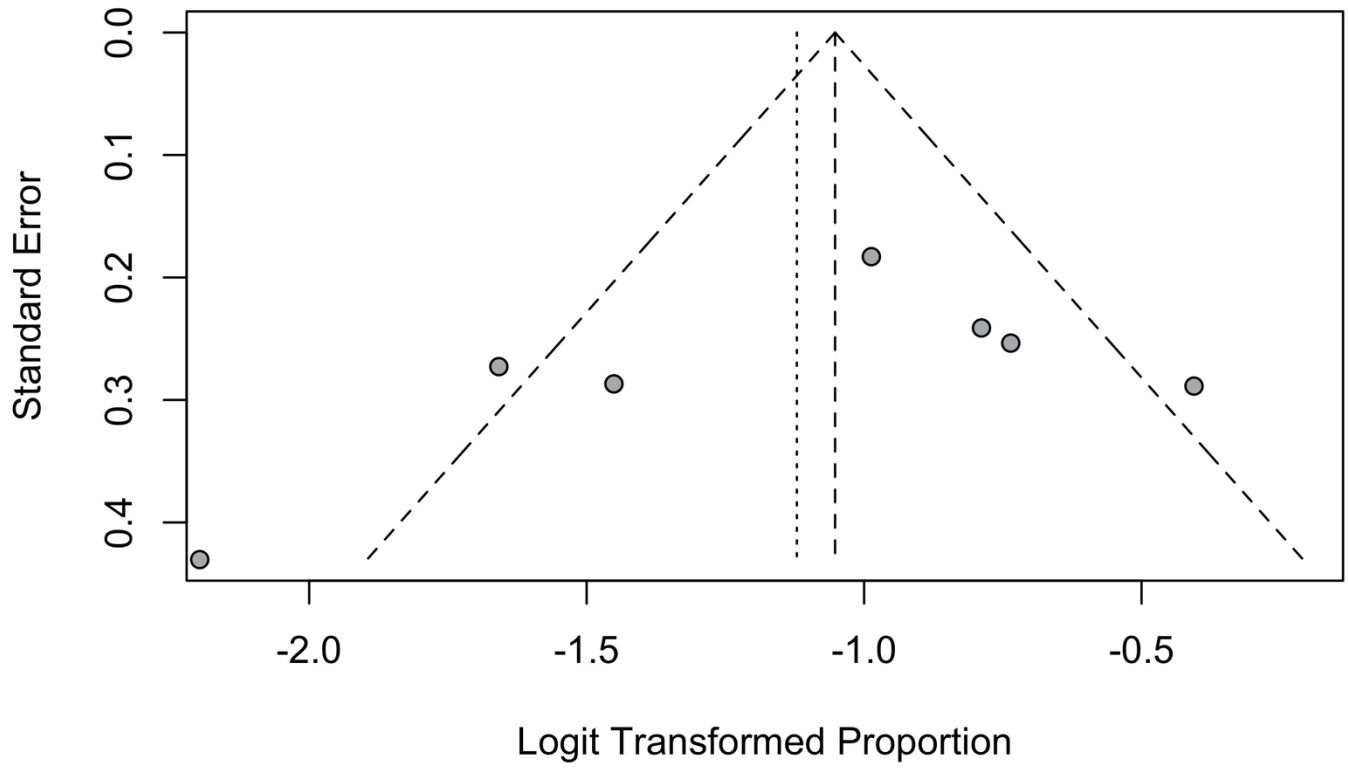

Grey dots = Original studies.

1.2.8. Figure S13. Funnel plot of all epilepsy with ID studies

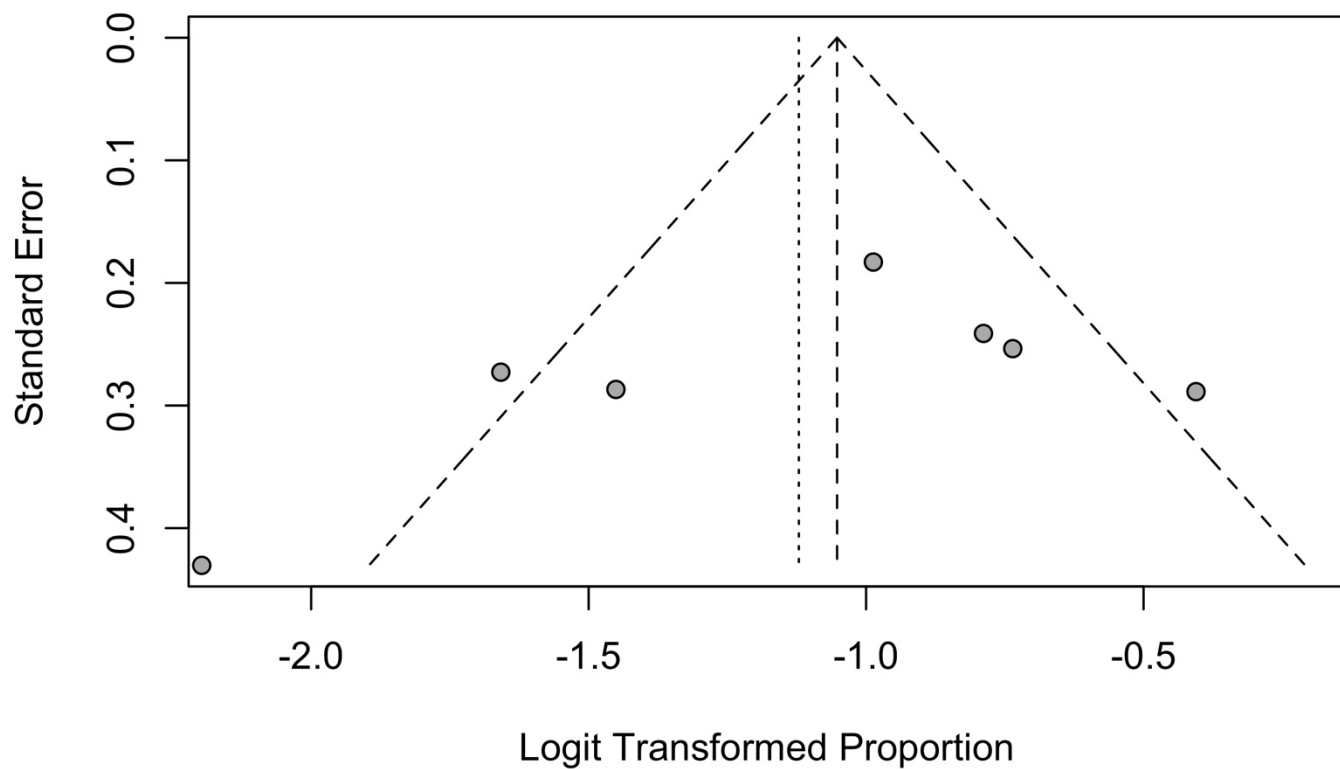

*Grey dots = Original studies.*

## 1.2.9. S14. Meta-analysis of the diagnostic yield by DEE

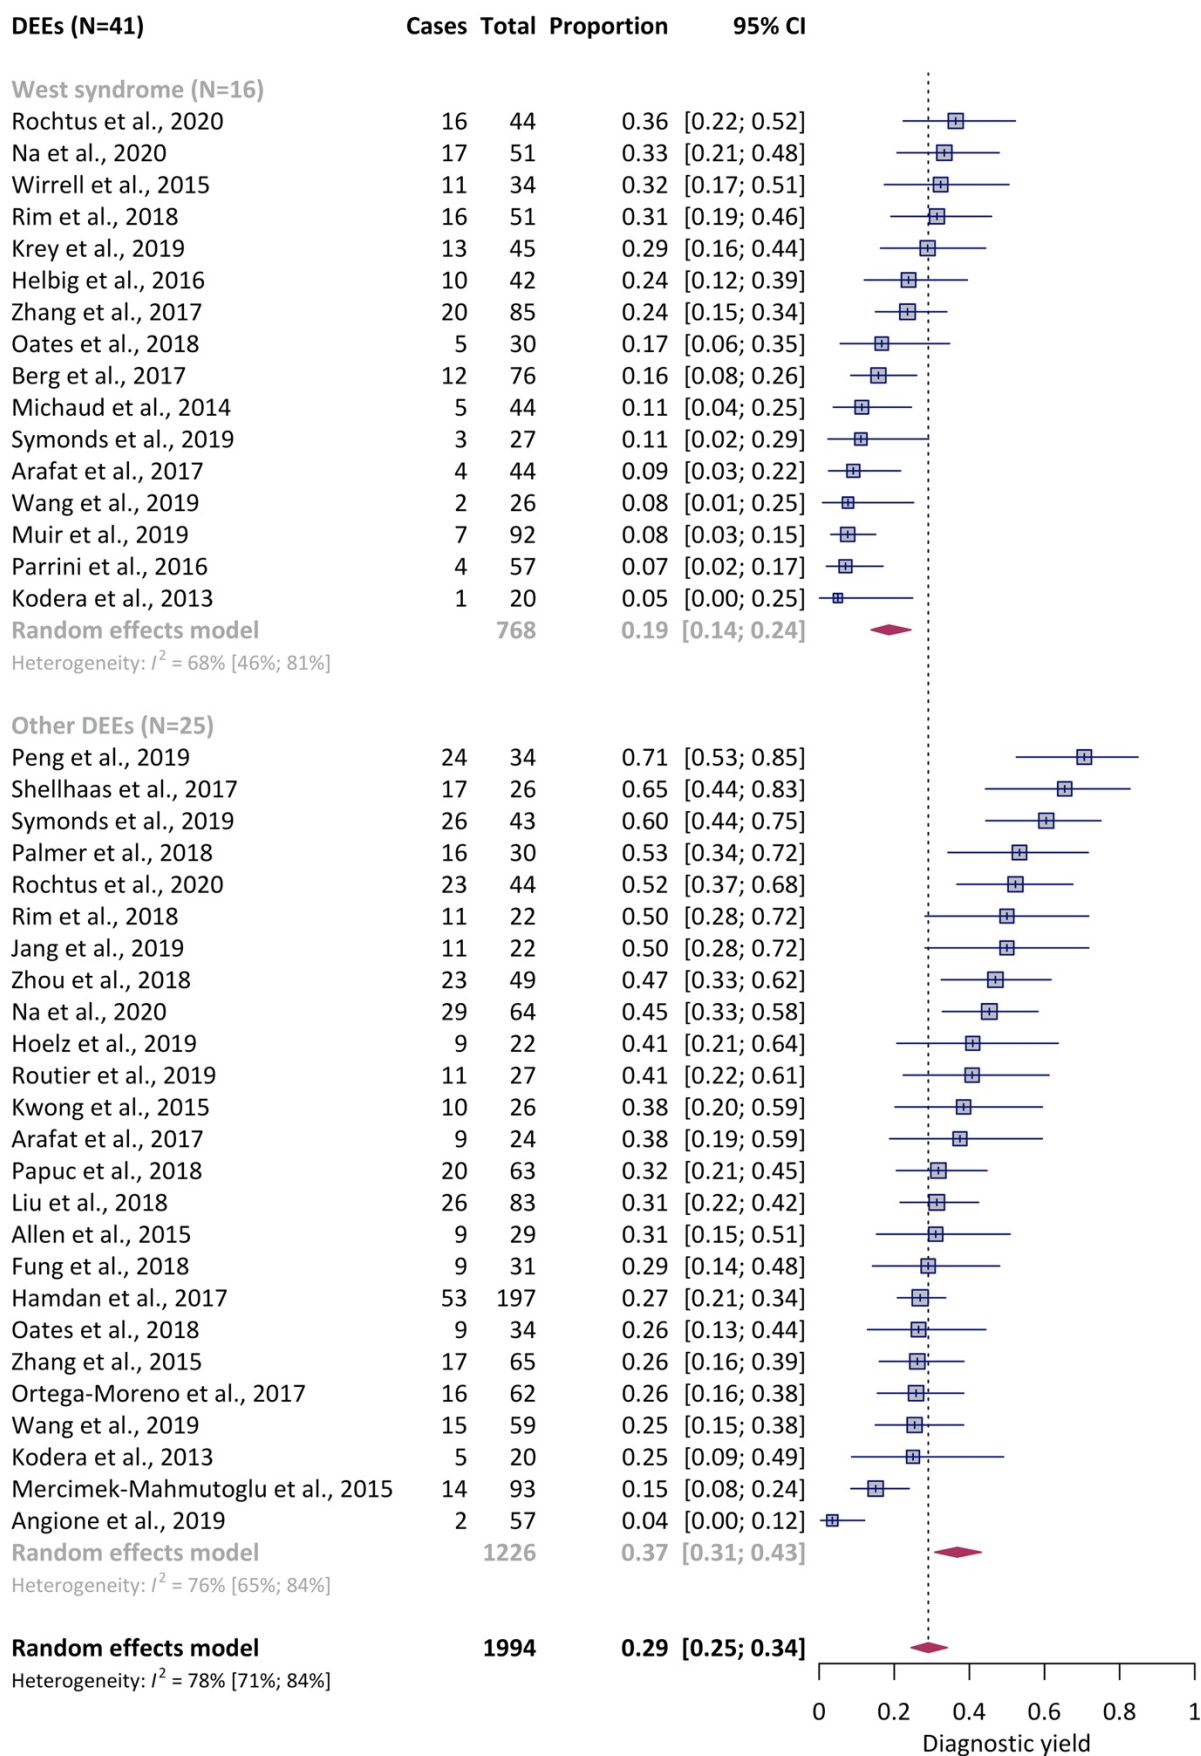



Abbreviations: DEEs = developmental epileptic encephalopathies, CI = confidence interval,  $I^2$  = estimated proportion of the variance in study estimates that is due to heterogeneity, Proportion = fraction of individuals with a positive genetic test, i.e. pathogenic or likely pathogenic variant.

1.2.10. Figure S15. Funnel plot of all WS studies

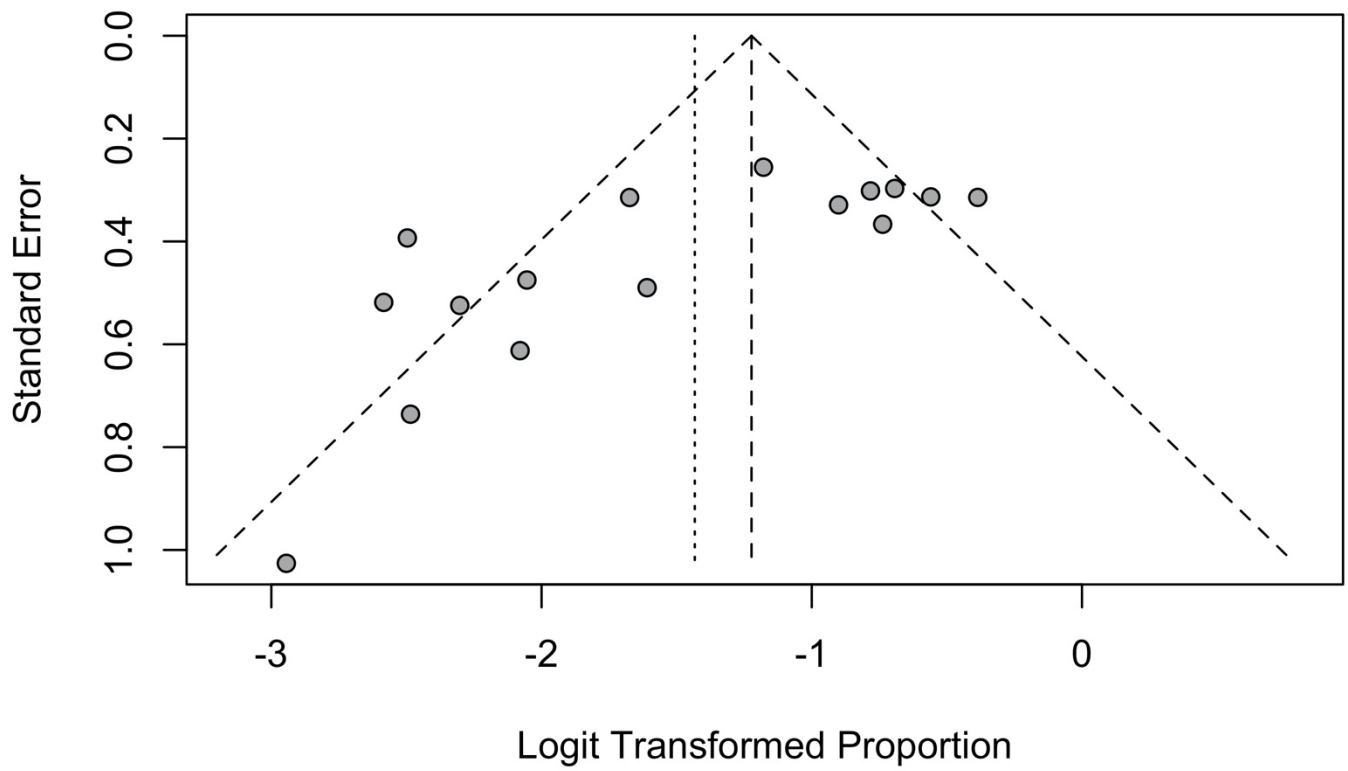

Grey dots = Original studies.

1.2.11. Figure S16. Funnel plot of all other DEE studies

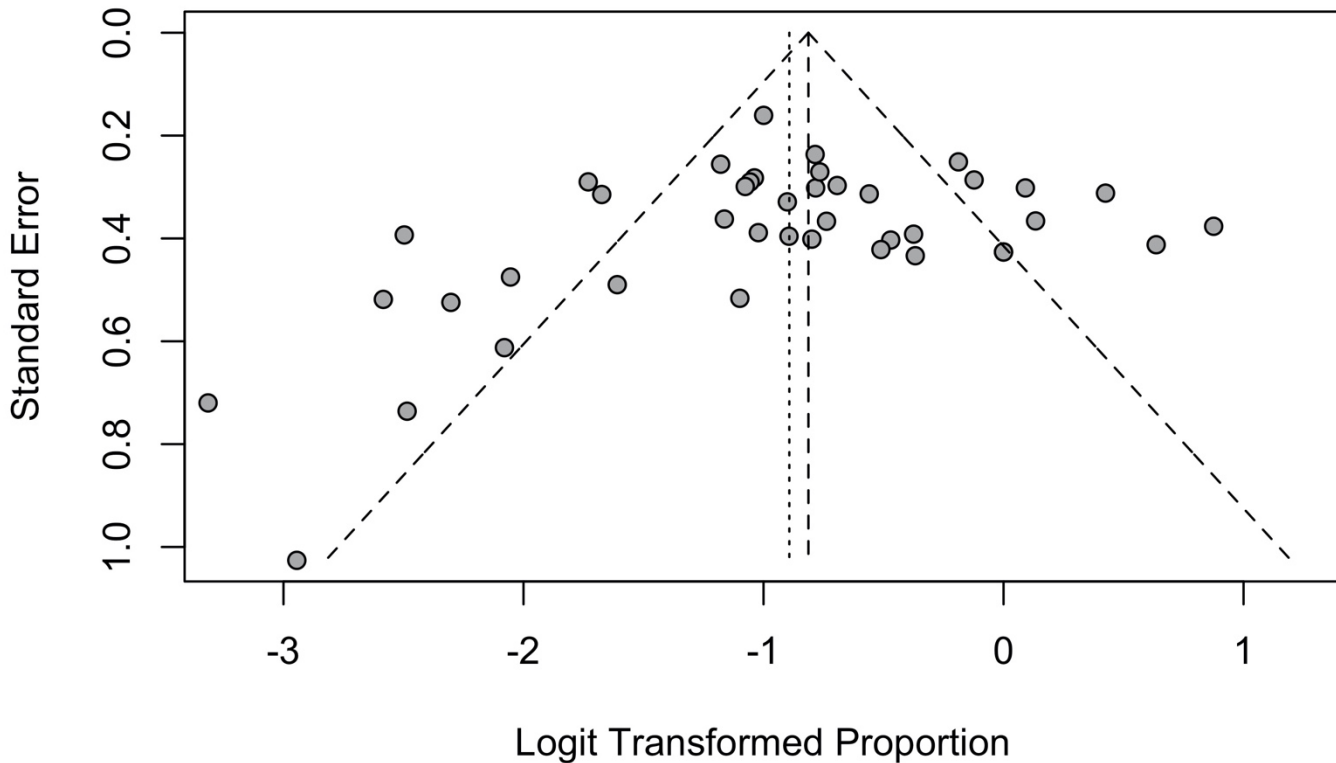

Grey dots = Original studies.

1.2.12. Figure S17. Error bar plot by subtype

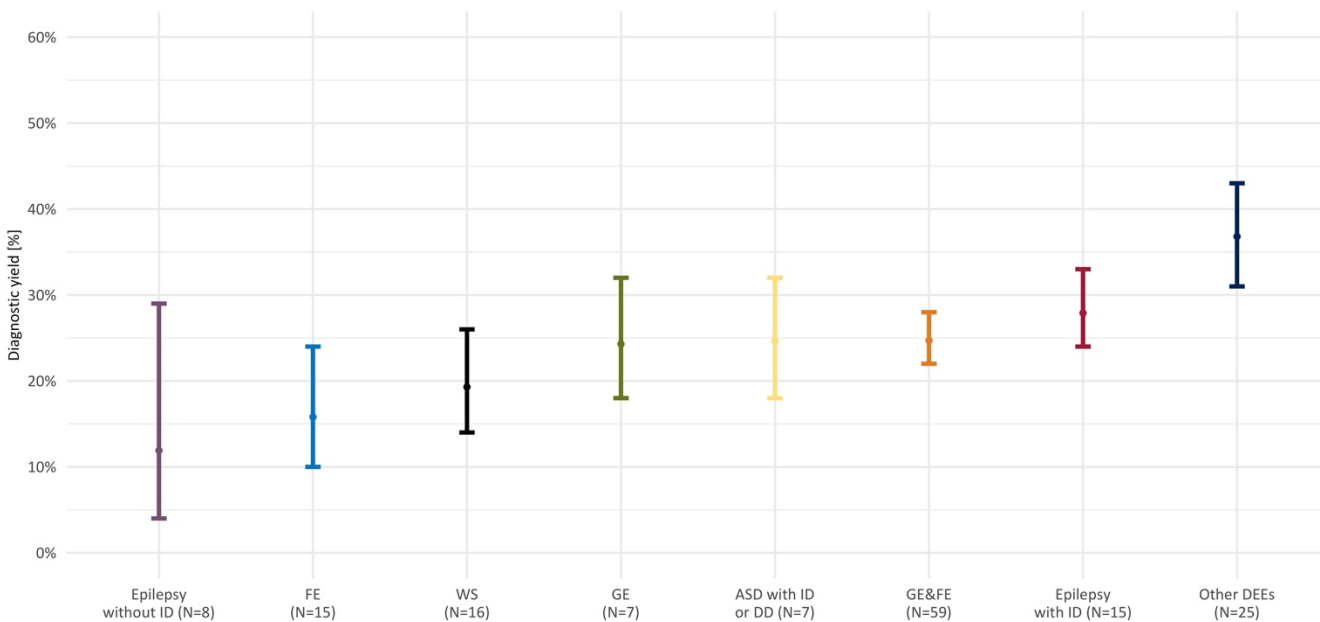

Abbreviations: GE&FE = combined generalized and focal epilepsy, FE = focal epilepsy, GE = generalized epilepsy, WS = West syndrome, ASD with ID or DD = autism spectrum disorder with intellectual disability or developmental delay, DEEs = developmental epileptic encephalopathies.

### 1.3. Meta analyses by sequencing technology

#### 1.3.1. Figure S18. Meta-analysis of the diagnostic yield of sequencing technologies

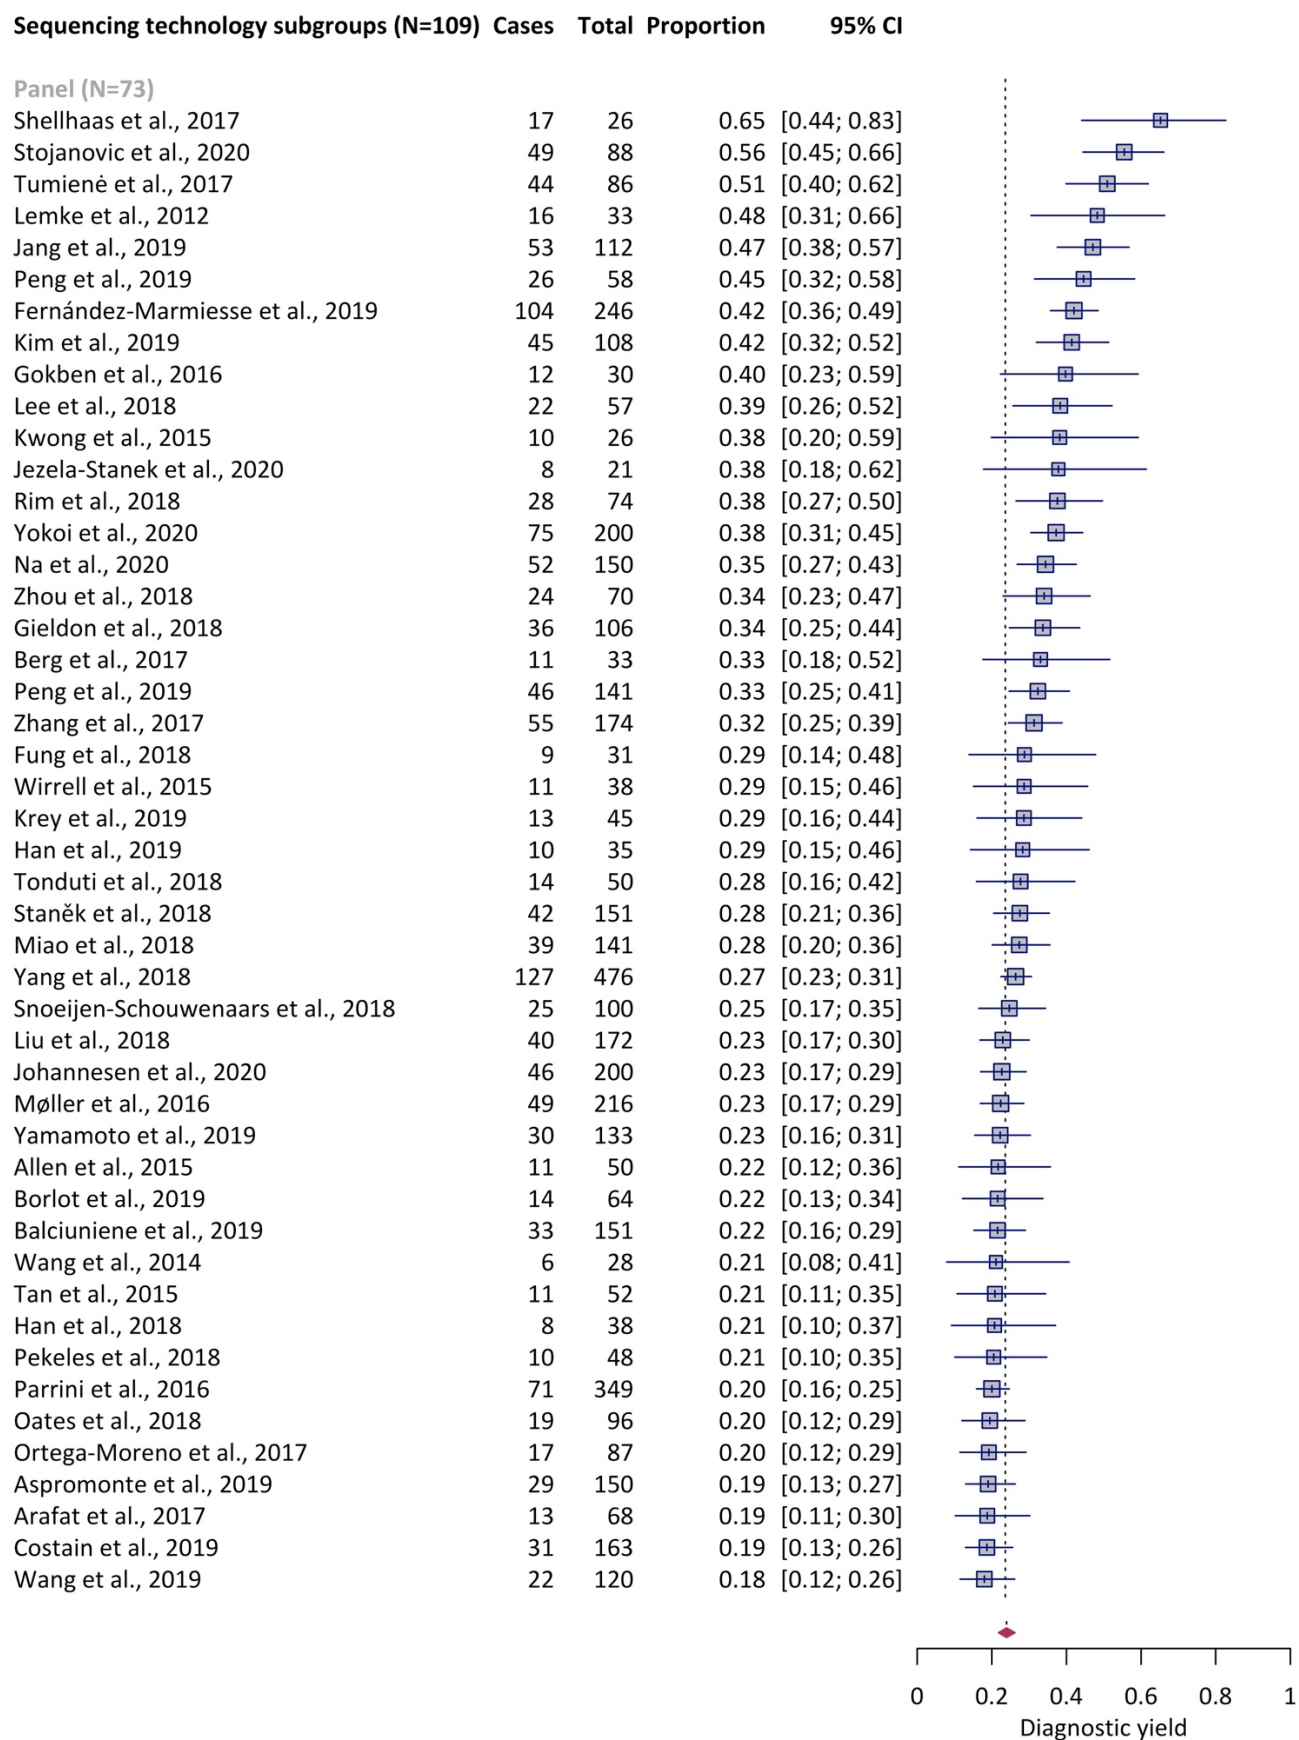

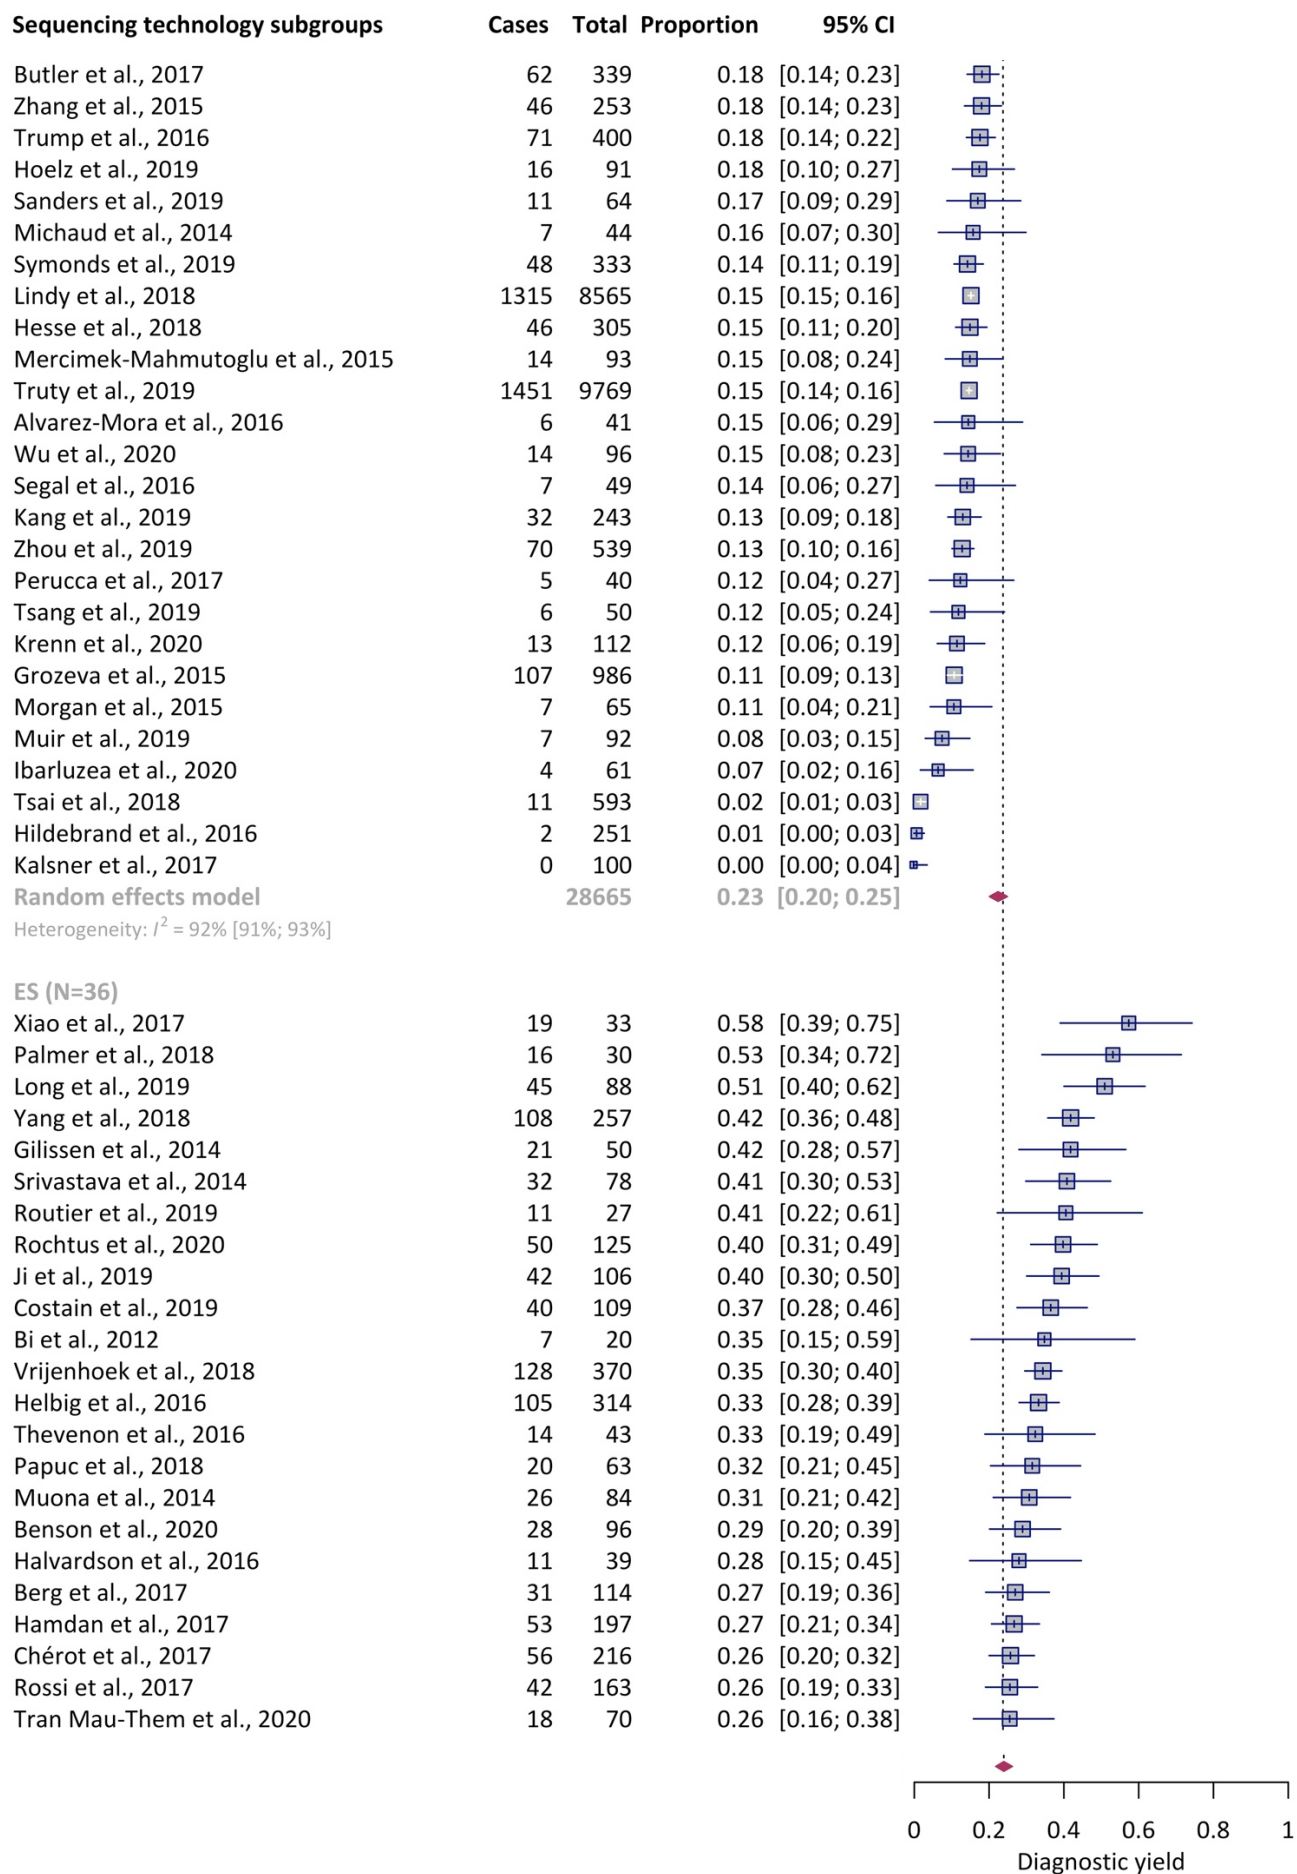

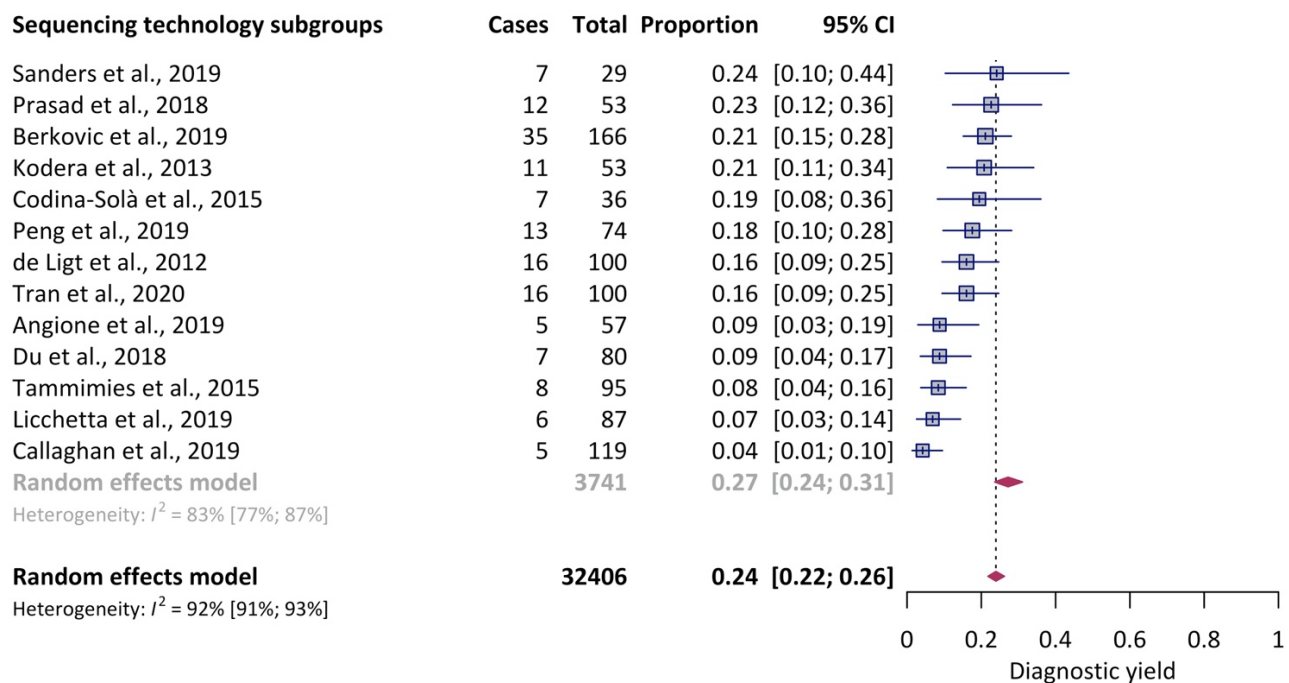

Abbreviations: *CI* = confidence interval,  $I^2$  = estimated proportion of the variance in study estimates that is due to heterogeneity, *Proportion* = fraction of individuals with a positive genetic test, i.e. pathogenic or likely pathogenic variant.

1.3.2. Figure S19. Funnel plot of all Panel studies

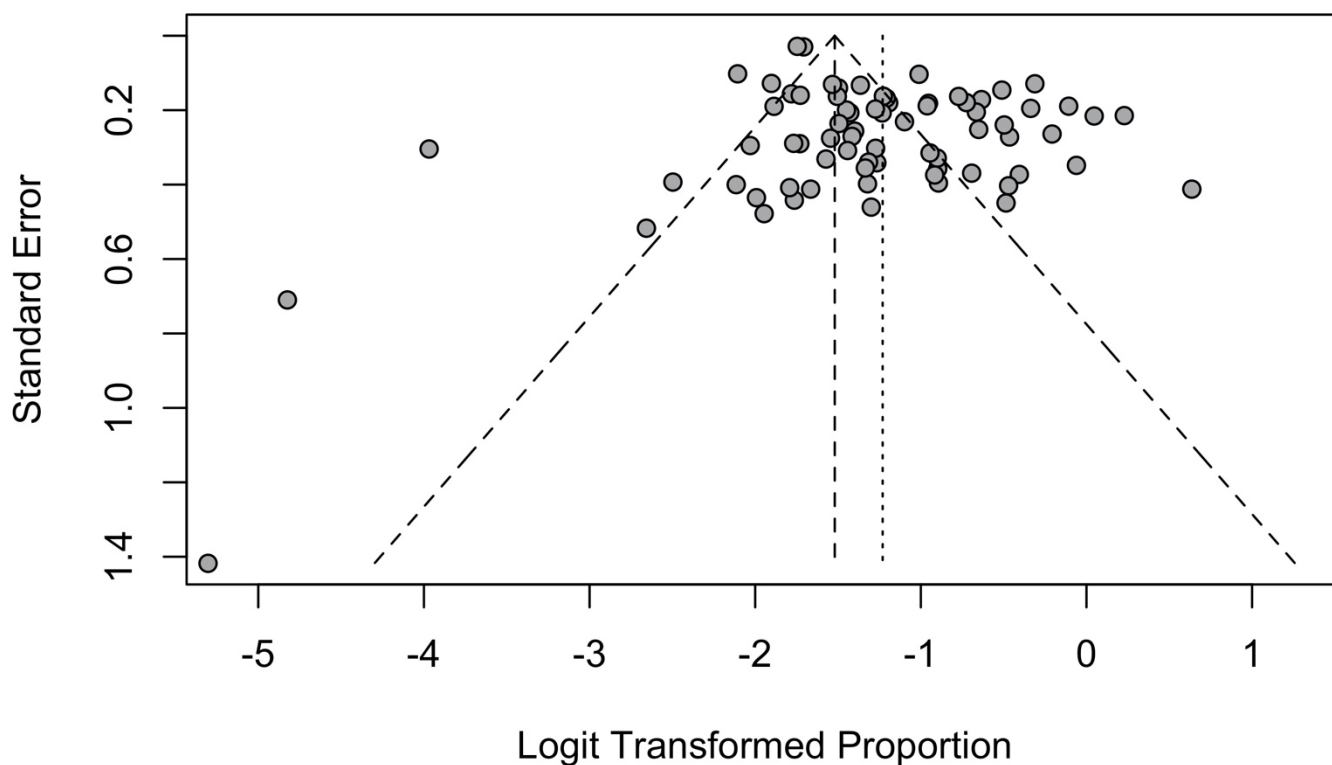

Grey dots = Original studies.

1.3.3. Figure S20. Funnel plot of all ES studies

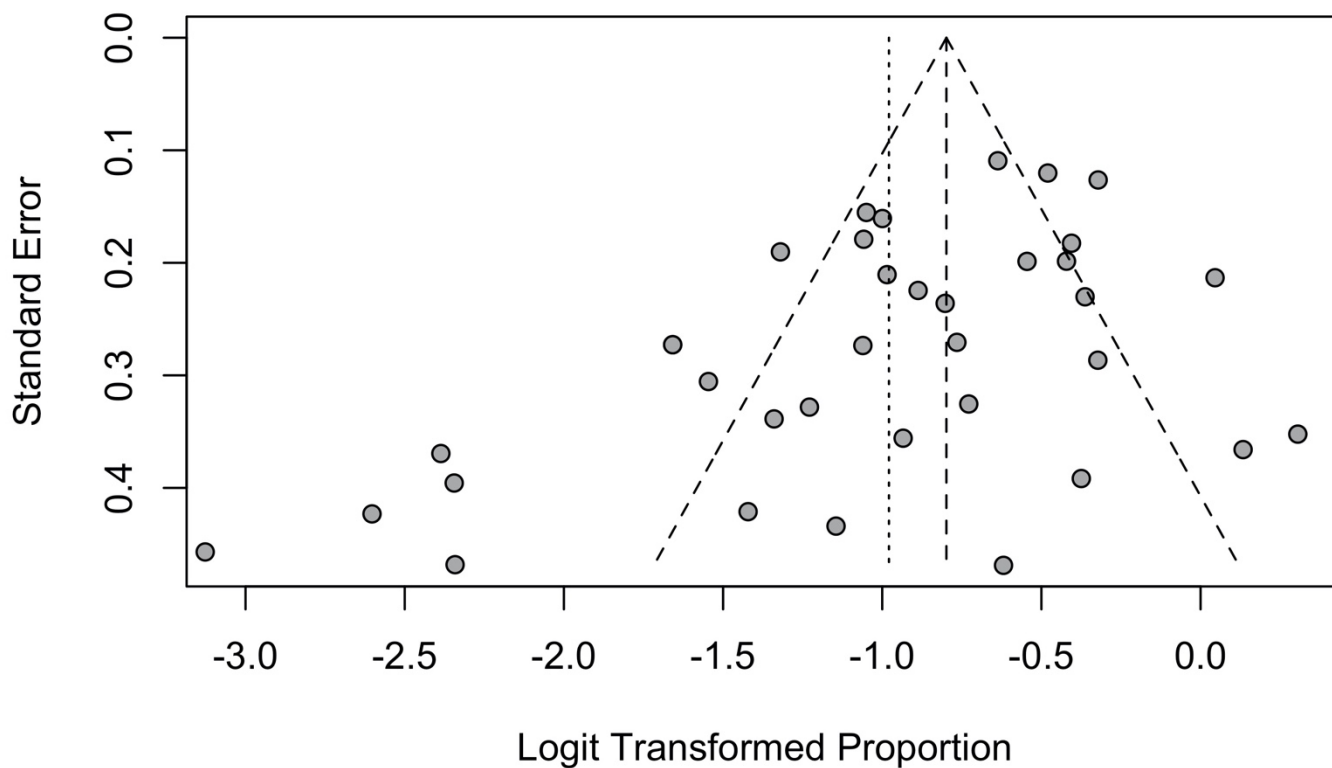

*Grey dots = Original studies.*

1.3.4. Figure S21. Error bar plot of the diagnostic yield by sequencing technology

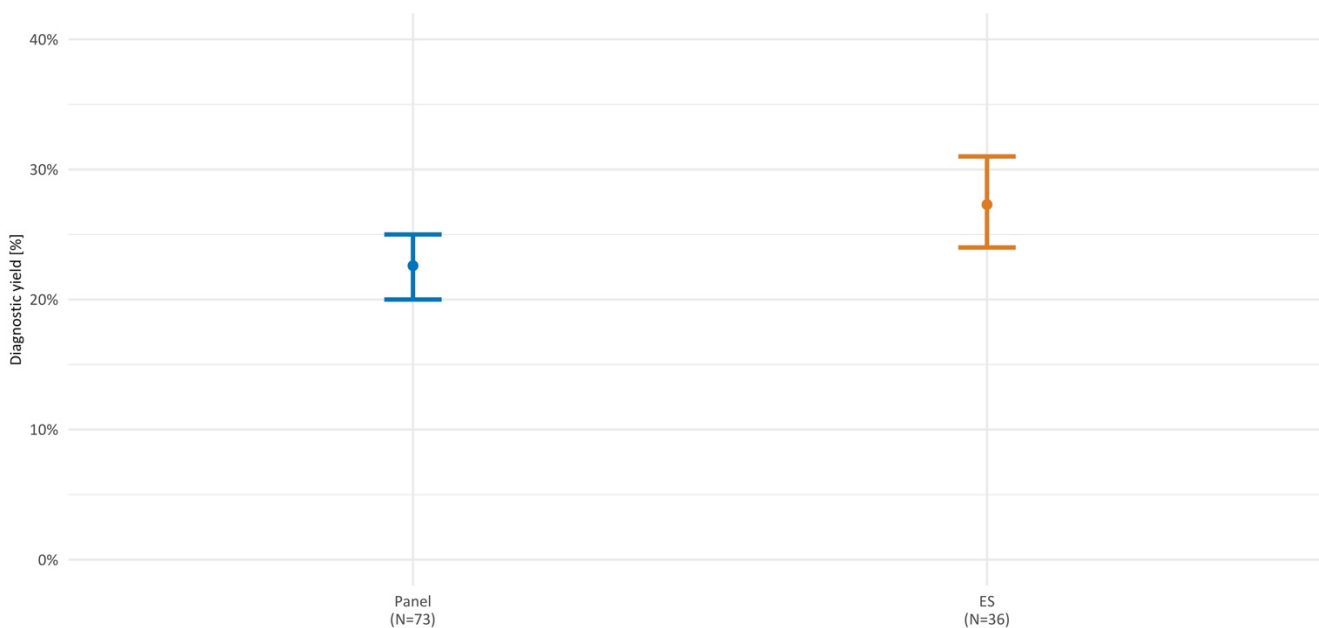

*The diagnostic yield across Panel and ES.*

*Abbreviations: Panel = targeted gene panel sequencing, ES = exome sequencing.*

## 1.4. Meta analyses by age of onset

### 1.4.1. Figure S22. Meta-analysis of the diagnostic yield of all epilepsy studies by age of onset

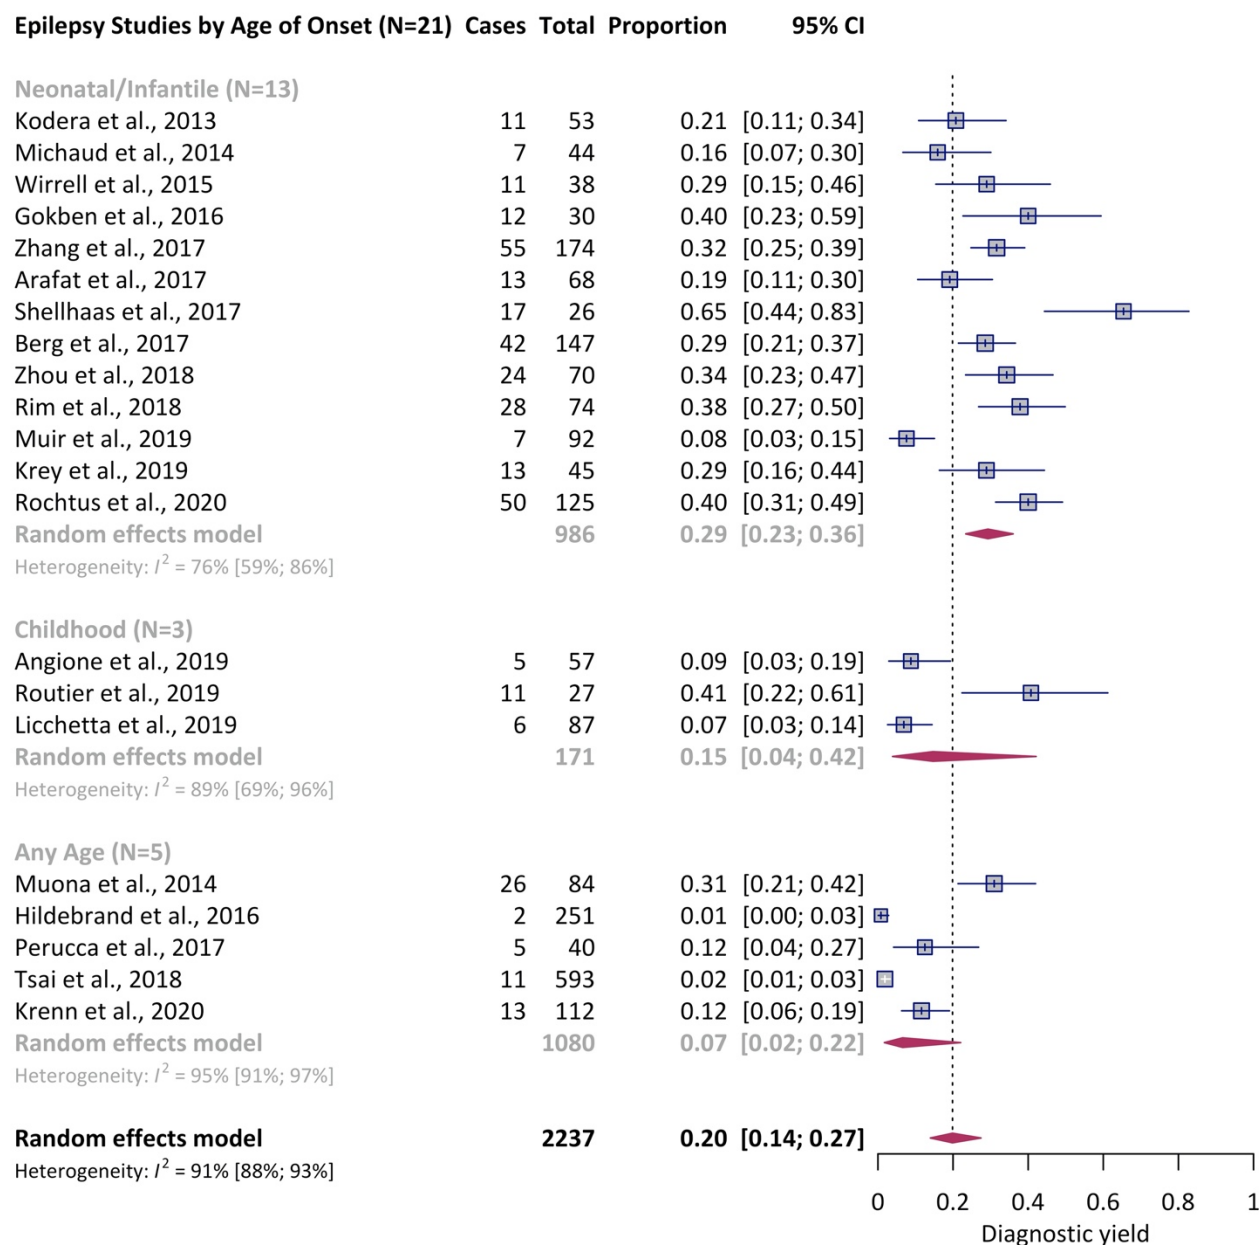

Abbreviations: CI = confidence interval,  $I^2$  = estimated proportion of the variance in study estimates that is due to heterogeneity, Proportion = fraction of individuals with a positive genetic test, i.e. pathogenic or likely pathogenic variant.

1.4.2. Figure S23. Funnel plot of all Neonatal/Infantile studies

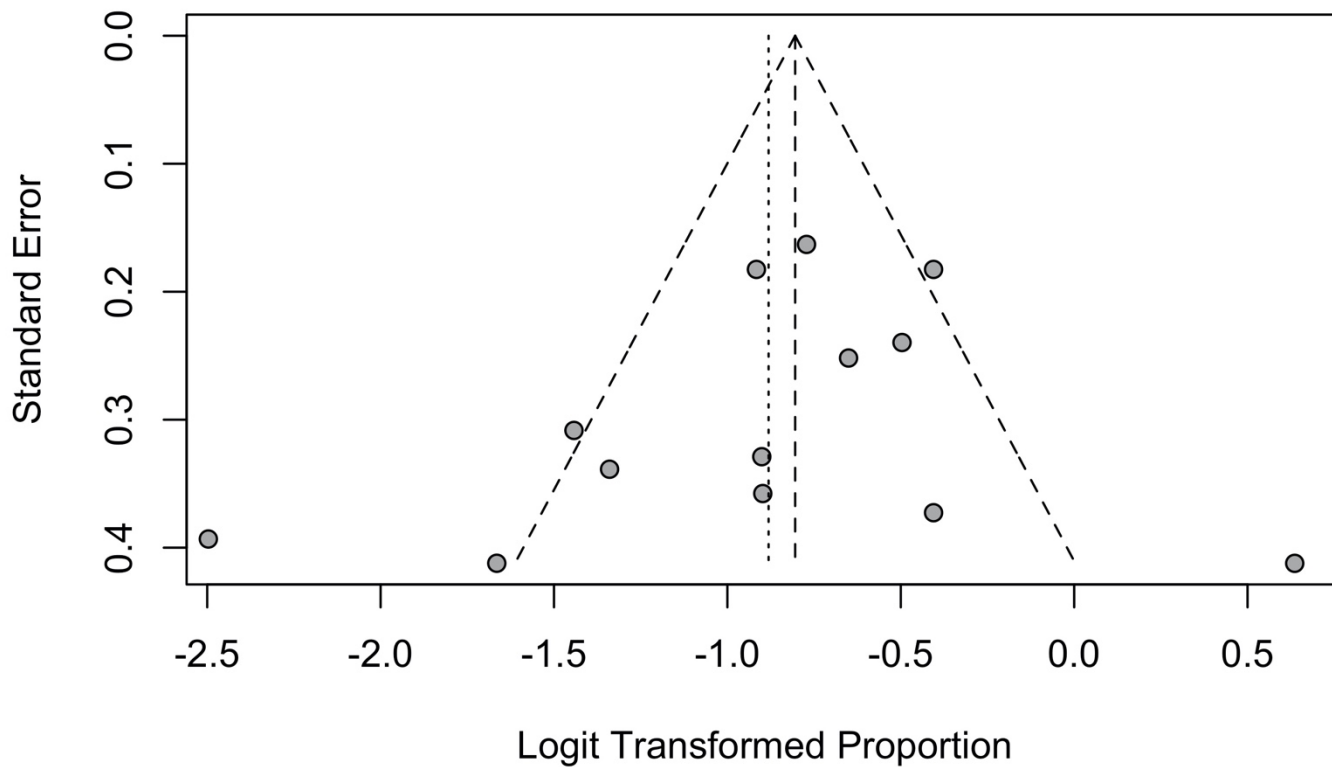

Grey dots = Original studies.

1.4.3. Figure S24. Funnel plot of all Childhood studies

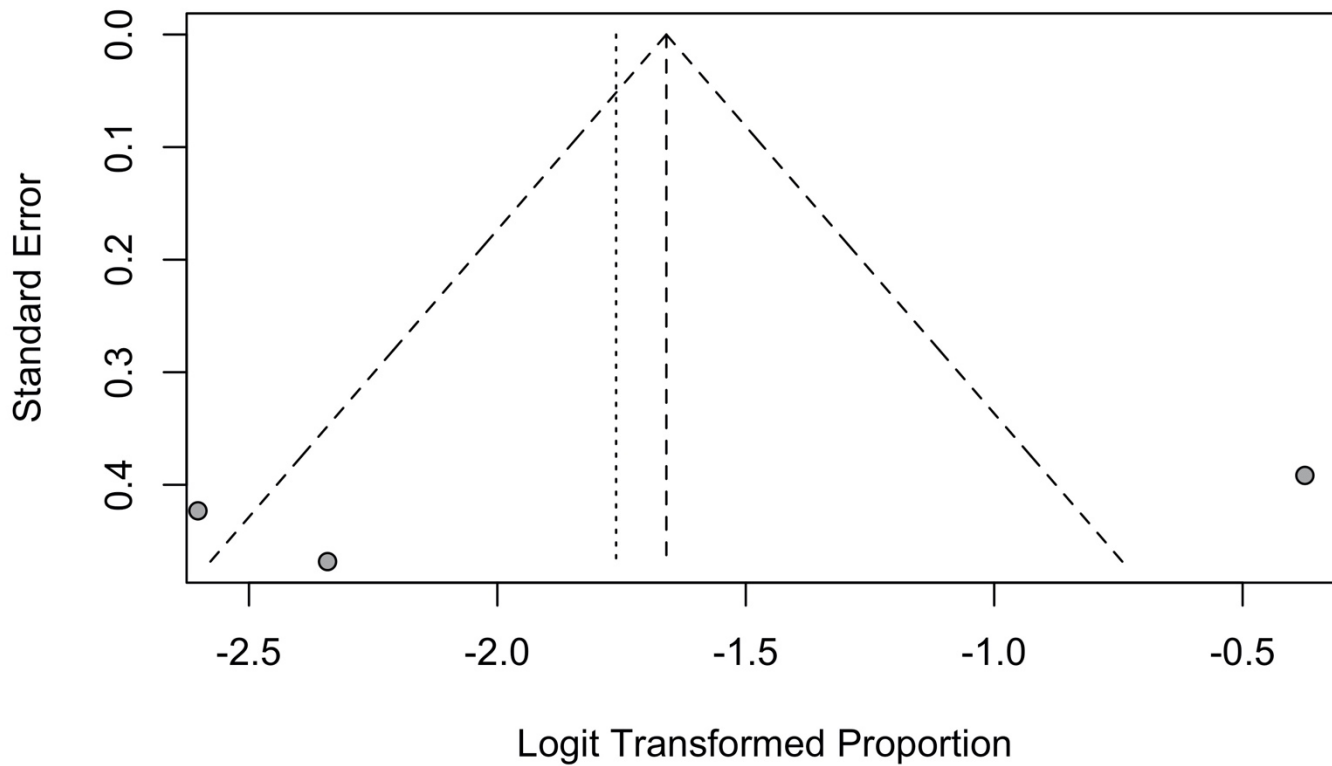

Grey dots = Original studies.



1.4.4. Figure S25. Funnel plot of all Any Age studies

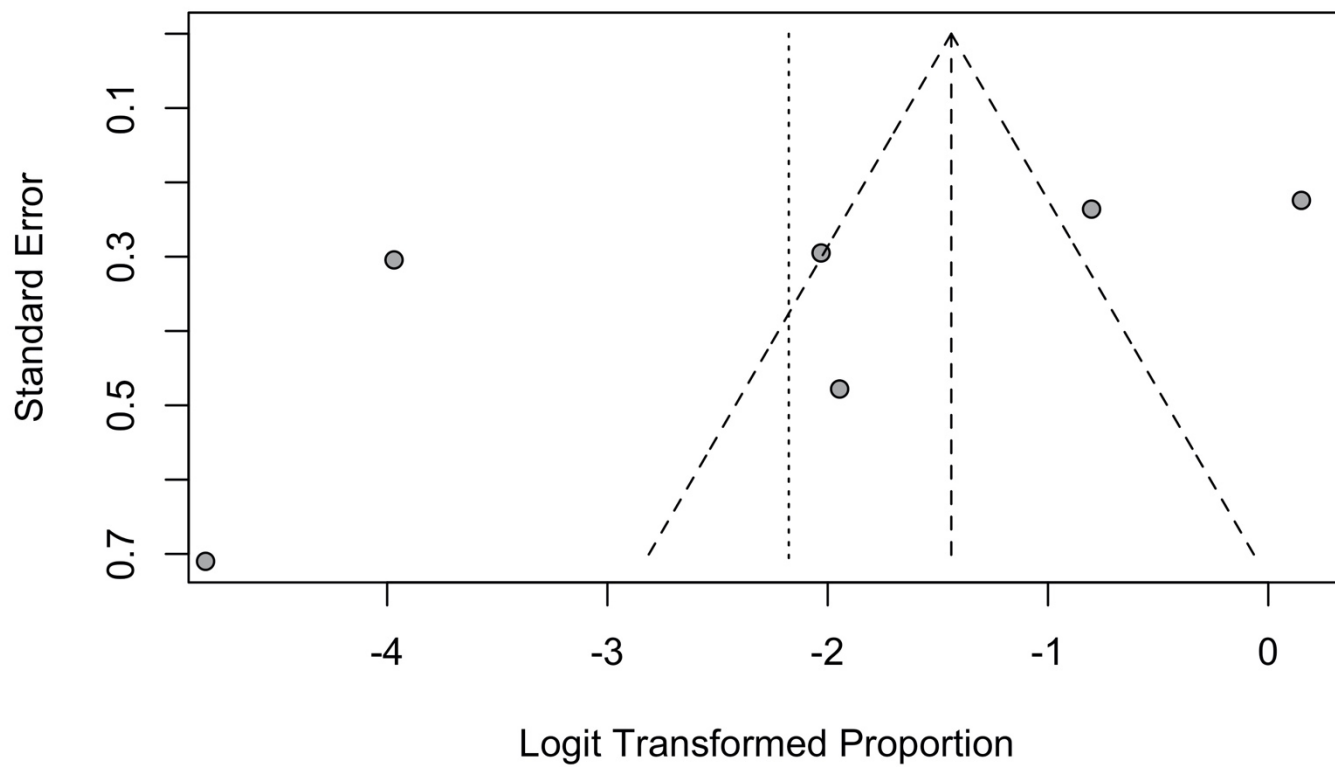

*Grey dots = Original studies.*

## 2. Reported genes

2.1. Figure S26. Number and rate of genes with pathogenic variant

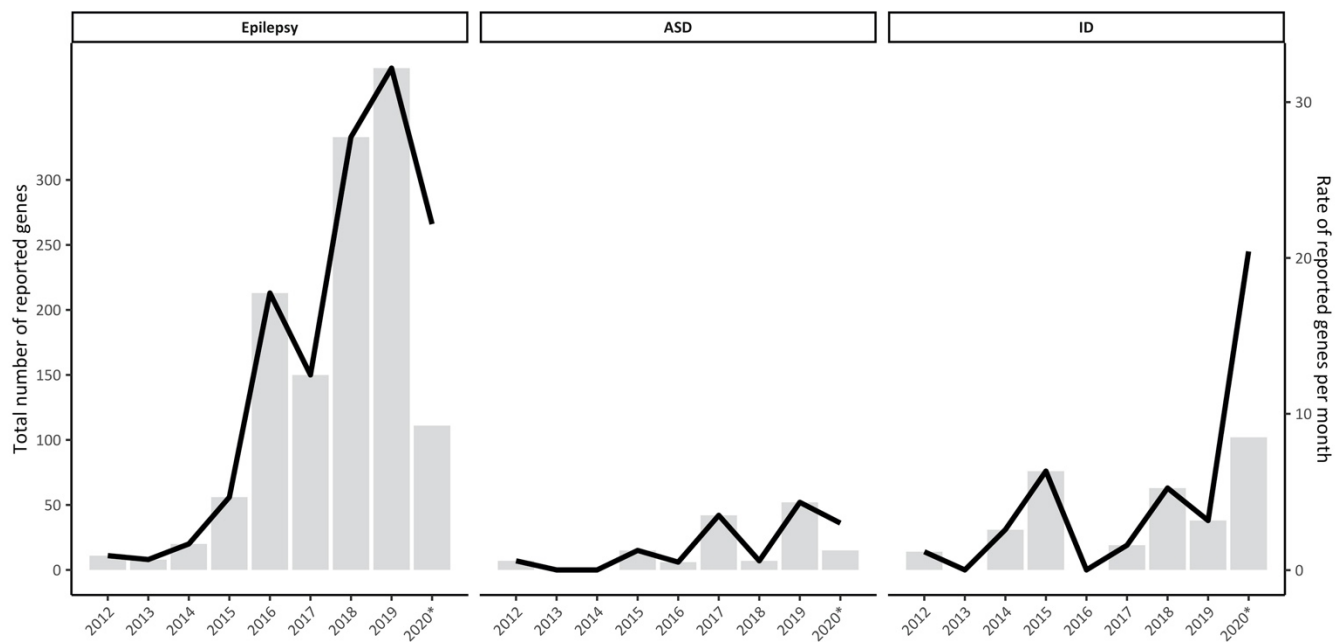

The bars represent the number of genes with pathogenic variants. The line represents the rate of genes per month and year. The number of identified genes increased rapidly in recent years for epilepsy. For ASD and ID the number of reported genes with pathogenic variants is low.

Abbreviations: ASD = autism spectrum disorder, ID = intellectual disability, \* = Data were collected until May 20, 2020.

### 3. Variant interpretation, VUS, and benign variants

3.1. Figure S27. Level of variant interpretation and reporting as well as the proportion of the studies which reported VUS and benign variants

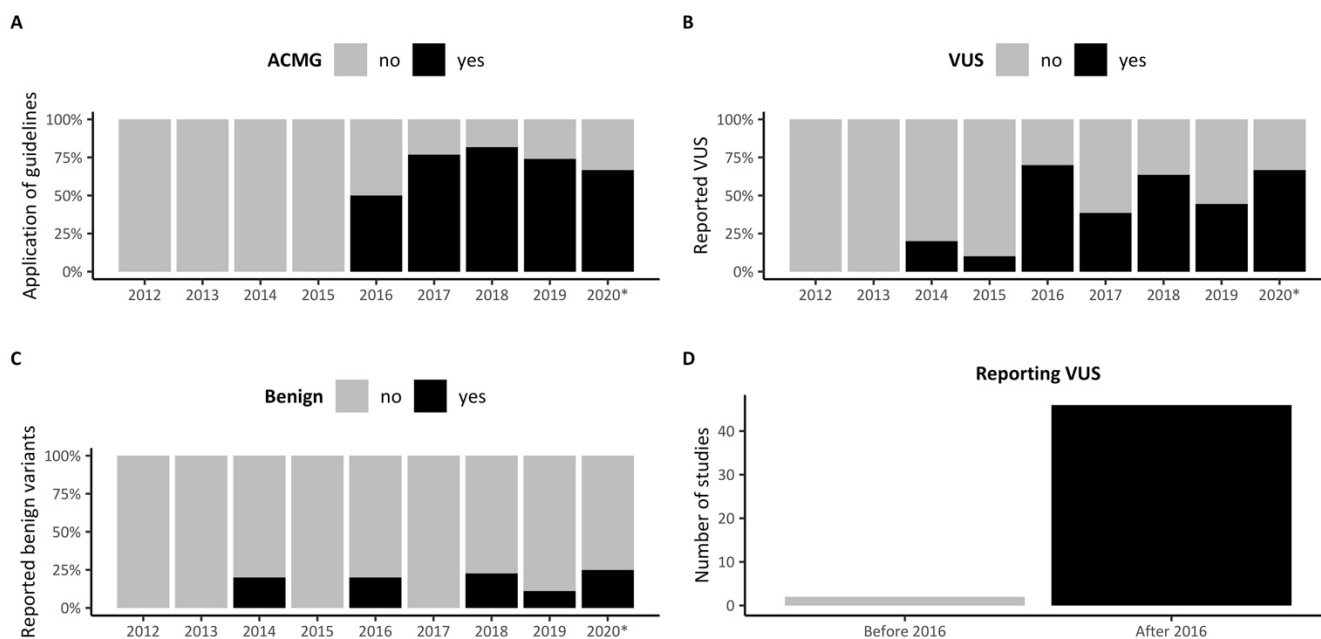

Data analyzed from 103 studies. **A** Since the introduction of the ACMG guidelines in 2015, there is a clear trend in adopting these in clinical sequencing studies beginning in 2016. **B** Reporting VUS becomes more common practice over time. **C** Benign variants are still being reported rather infrequently to date; their potential clinical use is considered low. **D** The number of studies reporting VUS has increased significantly after the introduction of the ACMG guidelines (OR = 38.6,  $P = 5.2 \times 10^{-14}$ ).

Abbreviation: \* = Data were collected until May 20, 2020.

## 4. References of all studies included in meta-analysis

### 4.1. Table S1. List of all 103 studies

1. Allen NM, Conroy J, Shahwan A, Lynch B, Correa RG, Pena SDJ, et al. Unexplained early onset epileptic encephalopathy: Exome screening and phenotype expansion. *Epilepsia*. 2016 Jan;57(1):e12–7.
2. Alvarez-Mora MI, Calvo Escalona R, Puig Navarro O, Madrigal I, Quintela I, Amigo J, et al. Comprehensive molecular testing in patients with high functioning autism spectrum disorder. *Mutation Research/Fundamental and Molecular Mechanisms of Mutagenesis*. 2016 Feb;784–785:46–52.
3. Angione K, Eschbach K, Smith G, Joshi C, Demarest S. Genetic testing in a cohort of patients with potential epilepsy with myoclonic-atonic seizures. *Epilepsy Research*. 2019 Feb;150:70–7.
4. Arafat A, Jing P, Ma Y, Pu M, Nan G, Fang H, et al. Unexplained Early Infantile Epileptic Encephalopathy in Han Chinese Children: Next-Generation Sequencing and Phenotype Enriching. *Sci Rep*. 2017 May;7(1):46227.
5. Aspromonte MC, Bellini M, Gasparini A, Carraro M, Bettella E, Polli R, et al. Characterization of intellectual disability and autism comorbidity through gene panel sequencing. *Hum Mutat*. 2019;40(9):1346–63.
6. Balciuniene J, DeChene ET, Akgumus G, Romasko EJ, Cao K, Dubbs HA, et al. Use of a Dynamic Genetic Testing Approach for Childhood-Onset Epilepsy. *JAMA Netw Open*. 2019 Apr 5;2(4):e192129.
7. Benson KA, White M, Allen NM, Byrne S, Carton R, Comerford E, et al. A comparison of genomic diagnostics in adults and children with epilepsy and comorbid intellectual disability. *Eur J Hum Genet*. 2020 Apr 1;
8. Berg AT, Coryell J, Saneto RP, Grinspan ZM, Alexander JJ, Kekis M, et al. Early-Life Epilepsies and the Emerging Role of Genetic Testing. *JAMA Pediatr*. 2017 01;171(9):863–71.
9. Bi C, Wu J, Jiang T, Liu Q, Cai W, Yu P, et al. Mutations of *ANK3* identified by exome sequencing are associated with autism susceptibility. *Hum Mutat*. 2012 Dec;33(12):1635–8.
10. Borlot F, de Almeida BI, Combe SL, Andrade DM, Filloux FM, Myers KA. Clinical utility of multigene panel testing in adults with epilepsy and intellectual disability. *Epilepsia*. 2019;60(8):1661–9.
11. Butler KM, da Silva C, Alexander JJ, Hegde M, Escayg A. Diagnostic Yield From 339 Epilepsy Patients Screened on a Clinical Gene Panel. *Pediatric Neurology*. 2017 Dec;77:61–6.
12. Callaghan DB, Rogic S, Tan PPC, Calli K, Qiao Y, Baldwin R, et al. Whole genome sequencing and variant discovery in the ASPIRE autism spectrum disorder cohort. *Clin Genet*. 2019 Apr 30;cge.13556.

13. Cerebral Calcification International Study Group, Tonduti D, Panteghini C, Pichiecchio A, Decio A, Carecchio M, et al. Encephalopathies with intracranial calcification in children: clinical and genetic characterization. *Orphanet J Rare Dis.* 2018 Dec;13(1):135.
14. Chérot E, Keren B, Dubourg C, Carré W, Fradin M, Lavillaureix A, et al. Using medical exome sequencing to identify the causes of neurodevelopmental disorders: Experience of 2 clinical units and 216 patients: CHÉROT et al. *Clin Genet.* 2018 Mar;93(3):567–76.
15. Codina-Solà M, Rodríguez-Santiago B, Homs A, Santoyo J, Rigau M, Aznar-Laín G, et al. Integrated analysis of whole-exome sequencing and transcriptome profiling in males with autism spectrum disorders. *Molecular Autism.* 2015 Dec;6(1):21.
16. Costain G, Cordeiro D, Matviychuk D, Mercimek-Andrews S. Clinical Application of Targeted Next-Generation Sequencing Panels and Whole Exome Sequencing in Childhood Epilepsy. *Neuroscience.* 2019 Sep 2;
17. de Ligt J, Willemsen MH, van Bon BWM, Kleefstra T, Yntema HG, Kroes T, et al. Diagnostic Exome Sequencing in Persons with Severe Intellectual Disability. *N Engl J Med.* 2012 Nov 15;367(20):1921–9.
18. Du X, Gao X, Liu X, Shen L, Wang K, Fan Y, et al. Genetic Diagnostic Evaluation of Trio-Based Whole Exome Sequencing Among Children With Diagnosed or Suspected Autism Spectrum Disorder. *Front Genet.* 2018 Nov 30;9:594.
19. Epilepsy Genetics Initiative. The Epilepsy Genetics Initiative: Systematic reanalysis of diagnostic exomes increases yield. *Epilepsia.* 2019 May;60(5):797–806.
20. Fernández-Marmiesse A, Roca I, Díaz-Flores F, Cantarín V, Pérez-Poyato MS, Fontalba A, et al. Rare Variants in 48 Genes Account for 42% of Cases of Epilepsy With or Without Neurodevelopmental Delay in 246 Pediatric Patients. *Front Neurosci.* 2019;13:1135.
21. Fung C-W, Kwong AK-Y, Wong VC-N. Gene panel analysis for nonsyndromic cryptogenic neonatal/infantile epileptic encephalopathy. *Epilepsia Open.* 2017 Jun;2(2):236–43.
22. Gieldon L, Mackenroth L, Kahlert A-K, Lemke JR, Pormann J, Schallner J, et al. Diagnostic value of partial exome sequencing in developmental disorders. *Kaya N, editor. PLoS ONE.* 2018 Aug 9;13(8):e0201041.
23. Gilissen C, Hehir-Kwa JY, Thung DT, van de Vorst M, van Bon BWM, Willemsen MH, et al. Genome sequencing identifies major causes of severe intellectual disability. *Nature.* 2014 Jul;511(7509):344–7.
24. Gokben S, Onay H, Yilmaz S, Atik T, Serdaroglu G, Tekin H, et al. Targeted next generation sequencing: the diagnostic value in early-onset epileptic encephalopathy. *Acta Neurol Belg.* 2017 Mar;117(1):131–8.
25. Grozeva D, Carss K, Spasic-Boskovic O, Tejada M-I, Gecz J, Shaw M, et al. Targeted Next-Generation Sequencing Analysis of 1,000 Individuals with Intellectual Disability: HUMAN MUTATION. *Human Mutation.* 2015 Dec;36(12):1197–204.

26. Halvardson J, Zhao JJ, Zaghlool A, Wentzel C, Georgii-Hemming P, Månsson E, et al. Mutations in *HECW2* are associated with intellectual disability and epilepsy. *J Med Genet*. 2016 Oct;53(10):697–704.
27. Hamdan FF, Myers CT, Cossette P, Lemay P, Spiegelman D, Laporte AD, et al. High Rate of Recurrent De Novo Mutations in Developmental and Epileptic Encephalopathies. *The American Journal of Human Genetics*. 2017 Nov;101(5):664–85.
28. Han JY, Jang JH, Park J, Lee IG. Targeted Next-Generation Sequencing of Korean Patients With Developmental Delay and/or Intellectual Disability. *Front Pediatr*. 2018 Dec 17;6:391.
29. Han JY, Jang W, Park J, Kim M, Kim Y, Lee IG. Diagnostic approach with genetic tests for global developmental delay and/or intellectual disability: Single tertiary center experience. *Annals of Human Genetics*. 2019 May;83(3):115–23.
30. Helbig KL, Farwell Hagman KD, Shinde DN, Mroske C, Powis Z, Li S, et al. Diagnostic exome sequencing provides a molecular diagnosis for a significant proportion of patients with epilepsy. *Genet Med*. 2016 Sep;18(9):898–905.
31. Hesse AN, Bevilacqua J, Shankar K, Reddi HV. Retrospective genotype-phenotype analysis in a 305 patient cohort referred for testing of a targeted epilepsy panel. *Epilepsy Research*. 2018 Aug;144:53–61.
32. Hildebrand MS, Myers CT, Carvill GL, Regan BM, Damiano JA, Mullen SA, et al. A targeted resequencing gene panel for focal epilepsy. *Neurology*. 2016 Apr 26;86(17):1605–12.
33. Hoelz H, Herdl C, Gerstl L, Tacke M, Vill K, von Stuelpnagel C, et al. Impact on Clinical Decision Making of Next-Generation Sequencing in Pediatric Epilepsy in a Tertiary Epilepsy Referral Center. *Clin EEG Neurosci*. 2019 Sep 25;1550059419876518.
34. Ibarluzea N, Hoz AB de la, Villate O, Llano I, Ocio I, Martí I, et al. Targeted Next-Generation Sequencing in Patients with Suggestive X-Linked Intellectual Disability. *Genes (Basel)*. 2020 02;11(1).
35. Jang SS, Kim SY, Kim H, Hwang H, Chae JH, Kim KJ, et al. Diagnostic Yield of Epilepsy Panel Testing in Patients With Seizure Onset Within the First Year of Life. *Front Neurol*. 2019;10:988.
36. Jezela-Stanek A, Ciara E, Jurkiewicz D, Kucharczyk M, Jędrzejowska M, Chrzanowska KH, et al. The phenotype-driven computational analysis yields clinical diagnosis for patients with atypical manifestations of known intellectual disability syndromes. *Mol Genet Genomic Med*. 2020 Apr 26;e1263.
37. Ji J, Shen L, Bootwalla M, Quindipan C, Tatarinova T, T Maglinte D, et al. A semi-automated whole exome sequencing workflow leads to increased diagnostic yield and identification of novel candidate variants. *Molecular Case Studies*. 2019 Feb 12;5:mcs.a003756.
38. Johannesen KM, Nikanorova N, Marjanovic D, Pavbro A, Larsen LHG, Rubboli G, et al. Utility of genetic testing for therapeutic decision-making in adults with epilepsy. *Epilepsia [Internet]*. 2020 May 19 [cited 2020 May 20];n/a(n/a). Available from: <https://onlinelibrary.wiley.com/doi/abs/10.1111/epi.16533>

39. Kalsner L, Twachtman-Bassett J, Tokarski K, Stanley C, Dumont-Mathieu T, Cotney J, et al. Genetic testing including targeted gene panel in a diverse clinical population of children with autism spectrum disorder: Findings and implications. *Mol Genet Genomic Med*. 2018;6(2):171–85.
40. Kang KW, Kim W, Cho YW, Lee SK, Jung K-Y, Shin W, et al. Genetic characteristics of non-familial epilepsy. *PeerJ*. 2019;7:e8278.
41. Kim SH, Kim B, Lee JS, Kim HD, Choi JR, Lee S-T, et al. Proband-Only Clinical Exome Sequencing for Neurodevelopmental Disabilities. *Pediatric Neurology*. 2019 Feb;S0887899418313481.
42. Kodera H, Kato M, Nord AS, Walsh T, Lee M, Yamanaka G, et al. Targeted capture and sequencing for detection of mutations causing early onset epileptic encephalopathy. *Epilepsia*. 2013 Jul;54(7):1262–9.
43. Krenn M, Wagner M, Hotzy C, Graf E, Weber S, Brunet T, et al. Diagnostic exome sequencing in non-acquired focal epilepsies highlights a major role of GATOR1 complex genes. *J Med Genet*. 2020 Feb 21;
44. Krey I, Krois-Neudenberger J, Hentschel J, Syrbe S, Polster T, Hanker B, et al. Genotype-phenotype correlation on 45 individuals with West syndrome. *Eur J Paediatr Neurol*. 2019 Nov 26;
45. Kwong AK-Y, Ho AC-C, Fung C-W, Wong VC-N. Analysis of mutations in 7 genes associated with neuronal excitability and synaptic transmission in a cohort of children with non-syndromic infantile epileptic encephalopathy. *PLoS ONE*. 2015;10(5):e0126446.
46. Lee CG, Lee J, Lee M. Multi-gene panel testing in Korean patients with common genetic generalized epilepsy syndromes. Russo E, editor. *PLoS ONE*. 2018 Jun 20;13(6):e0199321.
47. Lemke JR, Riesch E, Scheurenbrand T, Schubach M, Wilhelm C, Steiner I, et al. Targeted next generation sequencing as a diagnostic tool in epileptic disorders: Epilepsy Panel. *Epilepsia*. 2012 Aug;53(8):1387–98.
48. Licchetta L, Pippucci T, Baldassari S, Minardi R, Provini F, Mostacci B, et al. Sleep-related hypermotor epilepsy (SHE): Contribution of known genes in 103 patients. *Seizure*. 2019 Nov 23;74:60–4.
49. Lindy AS, Stosser MB, Butler E, Downtain-Pickersgill C, Shanmugham A, Retterer K, et al. Diagnostic outcomes for genetic testing of 70 genes in 8565 patients with epilepsy and neurodevelopmental disorders. *Epilepsia*. 2018;59(5):1062–71.
50. Liu J, Tong L, Song S, Niu Y, Li J, Wu X, et al. Novel and de novo mutations in pediatric refractory epilepsy. *Mol Brain*. 2018 Dec;11(1):48.
51. Long S, Zhou H, Li S, Wang T, Ma Y, Li C, et al. The Clinical and Genetic Features of Co-occurring Epilepsy and Autism Spectrum Disorder in Chinese Children. *Front Neurol*. 2019;10:505.

52. Mercimek-Mahmutoglu S, Patel J, Cordeiro D, Hewson S, Callen D, Donner EJ, et al. Diagnostic yield of genetic testing in epileptic encephalopathy in childhood. *Epilepsia*. 2015 May;56(5):707–16.
53. Miao P, Feng J, Guo Y, Wang J, Xu X, Wang Y, et al. Genotype and phenotype analysis using an epilepsy-associated gene panel in Chinese pediatric epilepsy patients. *Clin Genet*. 2018 Dec;94(6):512–20.
54. Michaud JL, Lachance M, Hamdan FF, Carmant L, Lortie A, Diadori P, et al. The genetic landscape of infantile spasms. *Human Molecular Genetics*. 2014 Sep 15;23(18):4846–58.
55. Møller RS, Larsen LHG, Johannesen KM, Talvik I, Talvik T, Vaher U, et al. Gene Panel Testing in Epileptic Encephalopathies and Familial Epilepsies. *Mol Syndromol*. 2016;7(4):210–9.
56. Morgan A, Gandin I, Belcaro C, Palumbo P, Palumbo O, Biamino E, et al. Target sequencing approach intended to discover new mutations in non-syndromic intellectual disability. *Mutation Research/Fundamental and Molecular Mechanisms of Mutagenesis*. 2015 Nov;781:32–6.
57. Muir AM, Myers CT, Nguyen NT, Saykally J, Craiu D, De Jonghe P, et al. Genetic heterogeneity in infantile spasms. *Epilepsy Res*. 2019;156:106181.
58. Muona M, Berkovic SF, Dibbens LM, Oliver KL, Maljevic S, Bayly MA, et al. A recurrent de novo mutation in *KCNC1* causes progressive myoclonus epilepsy. *Nat Genet*. 2015 Jan;47(1):39–46.
59. Na J-H, Shin S, Yang D, Kim B, Kim HD, Kim S, et al. Targeted gene panel sequencing in early infantile onset developmental and epileptic encephalopathy. *Brain Dev*. 2020 Mar 2;
60. Oates S, Tang S, Rosch R, Lear R, Hughes EF, Williams RE, et al. Incorporating epilepsy genetics into clinical practice: a 360° evaluation. *npj Genomic Med*. 2018 Dec;3(1):13.
61. Ortega-Moreno L, Giráldez BG, Soto-Insuga V, Losada-Del Pozo R, Rodrigo-Moreno M, Alarcón-Morcillo C, et al. Molecular diagnosis of patients with epilepsy and developmental delay using a customized panel of epilepsy genes. Russo E, editor. *PLoS ONE*. 2017 Nov 30;12(11):e0188978.
62. Palmer EE, Schofield D, Shrestha R, Kandula T, Macintosh R, Lawson JA, et al. Integrating exome sequencing into a diagnostic pathway for epileptic encephalopathy: Evidence of clinical utility and cost effectiveness. *Mol Genet Genomic Med*. 2018 Mar;6(2):186–99.
63. Papuc SM, Abela L, Steindl K, Begemann A, Simmons TL, Schmitt B, et al. The role of recessive inheritance in early-onset epileptic encephalopathies: a combined whole-exome sequencing and copy number study. *Eur J Hum Genet*. 2019 Mar;27(3):408–21.
64. Parrini E, Marini C, Mei D, Galuppi A, Cellini E, Pucatti D, et al. Diagnostic Targeted Resequencing in 349 Patients with Drug-Resistant Pediatric Epilepsies Identifies Causative Mutations in 30 Different Genes: HUMAN MUTATION. *Human Mutation*. 2017 Feb;38(2):216–25.
65. Pekeles H, Accogli A, Boudrahem-Addour N, Russell L, Parente F, Srour M. Diagnostic Yield of Intellectual Disability Gene Panels. *Pediatric Neurology*. 2019 Mar;92:32–6.



66. Peng J, Pang N, Wang Y, Wang X-L, Chen J, Xiong J, et al. Next-generation sequencing improves treatment efficacy and reduces hospitalization in children with drug-resistant epilepsy. *CNS Neurosci Ther.* 2019;25(1):14–20.
67. Perucca P, Scheffer IE, Harvey AS, James PA, Lunke S, Thorne N, et al. Real-world utility of whole exome sequencing with targeted gene analysis for focal epilepsy. *Epilepsy Research.* 2017 Mar;131:1–8.
68. Prasad A, Sdano MA, Vanzo RJ, Mowery-Rushton PA, Serrano MA, Hensel CH, et al. Clinical utility of exome sequencing in individuals with large homozygous regions detected by chromosomal microarray analysis. *BMC Med Genet.* 2018 Dec;19(1):46.
69. Rim JH, Kim SH, Hwang IS, Kwon SS, Kim J, Kim HW, et al. Efficient strategy for the molecular diagnosis of intractable early-onset epilepsy using targeted gene sequencing. *BMC Med Genomics.* 2018 Dec;11(1):6.
70. Roctus A, Olson HE, Smith L, Keith LG, El Achkar C, Taylor A, et al. Genetic diagnoses in epilepsy: The impact of dynamic exome analysis in a pediatric cohort. *Epilepsia.* 2020 Jan 19;
71. Rossi M, El-Khechen D, Black MH, Farwell Hagman KD, Tang S, Powis Z. Outcomes of Diagnostic Exome Sequencing in Patients With Diagnosed or Suspected Autism Spectrum Disorders. *Pediatric Neurology.* 2017 May;70:34-43.e2.
72. Routier L, Verny F, Barcia G, Chemaly N, Desguerre I, Colleaux L, et al. Exome sequencing findings in 27 patients with myoclonic-atonic epilepsy: Is there a major genetic factor? *Clin Genet.* 2019 Sep;96(3):254–60.
73. Sanders MWCB, Lemmens CMC, Jansen FE, Brilstra EH, Koeleman BPC, Braun KPJ, et al. Implications of genetic diagnostics in epilepsy surgery candidates: A single-center cohort study. *Epilepsia Open.* 2019 Dec;4(4):609–17.
74. Segal E, Pedro H, Valdez-Gonzalez K, Parisotto S, Gliksman F, Thompson S, et al. Diagnostic Yield of Epilepsy Panels in Children With Medication-Refractory Epilepsy. *Pediatric Neurology.* 2016 Nov;64:66–71.
75. Shellhaas RA, Wusthoff CJ, Tsuchida TN, Glass HC, Chu CJ, Massey SL, et al. Profile of neonatal epilepsies: Characteristics of a prospective US cohort. *Neurology.* 2017 Aug 29;89(9):893–9.
76. Snoeijen-Schouwenaars FM, van Ool JS, Verhoeven JS, van Mierlo P, Braakman HMH, Smeets EE, et al. Diagnostic exome sequencing in 100 consecutive patients with both epilepsy and intellectual disability. *Epilepsia.* 2019 Jan;60(1):155–64.
77. Srivastava S, Cohen JS, Vernon H, Barañano K, McClellan R, Jamal L, et al. Clinical whole exome sequencing in child neurology practice: WES in Child Neurology. *Ann Neurol.* 2014 Oct;76(4):473–83.
78. Staněk D, Laššuthová P, Štěrbová K, Vlčková M, Neupauerová J, Krůtová M, et al. Detection rate of causal variants in severe childhood epilepsy is highest in patients with seizure onset within the first four weeks of life. *Orphanet J Rare Dis.* 2018 Dec;13(1):71.

79. Stojanovic JR, Miletic A, Peterlin B, Maver A, Mijovic M, Borlja N, et al. Diagnostic and Clinical Utility of Clinical Exome Sequencing in Children With Moderate and Severe Global Developmental Delay / Intellectual Disability. *J Child Neurol*. 2020 Feb;35(2):116–31.
80. Symonds JD, Zuberi SM, Stewart K, McLellan A, O'Regan M, MacLeod S, et al. Incidence and phenotypes of childhood-onset genetic epilepsies: a prospective population-based national cohort. *Brain* [Internet]. [cited 2019 Jul 17]; Available from: <https://academic.oup.com/brain/advance-article/doi/10.1093/brain/awz195/5532195>
81. Tammimies K, Marshall CR, Walker S, Kaur G, Thiruvahindrapuram B, Lionel AC, et al. Molecular Diagnostic Yield of Chromosomal Microarray Analysis and Whole-Exome Sequencing in Children With Autism Spectrum Disorder. *JAMA*. 2015 Sep 1;314(9):895.
82. Tan CA, Topper S, del Gaudio D, Nelakuditi V, Shchelochkov O, Nowaczyk MJM, et al. Characterization of patients referred for non-specific intellectual disability testing: the importance of autosomal genes for diagnosis: Characterization of patients referred for non-specific ID testing. *Clin Genet*. 2016 Apr;89(4):478–83.
83. Thevenon J, Duffourd Y, Masurel-Paulet A, Lefebvre M, Feillet F, El Chehadeh-Djebbar S, et al. Diagnostic odyssey in severe neurodevelopmental disorders: toward clinical whole-exome sequencing as a first-line diagnostic test: Diagnostic odyssey in severe neurodevelopmental disorders. *Clin Genet*. 2016 Jun;89(6):700–7.
84. Tran KT, Le VS, Bui HTP, Do DH, Ly HTT, Nguyen HT, et al. Genetic landscape of autism spectrum disorder in Vietnamese children. *Sci Rep*. 2020 Mar 19;10(1):5034.
85. Tran Mau-Them F, Moutton S, Racine C, Vitobello A, Bruel A-L, Nambot S, et al. Second-tier trio exome sequencing after negative solo clinical exome sequencing: an efficient strategy to increase diagnostic yield and decipher molecular bases in undiagnosed developmental disorders. *Hum Genet* [Internet]. 2020 May 12 [cited 2020 May 20]; Available from: <https://doi.org/10.1007/s00439-020-02178-8>
86. Trump N, McTague A, Brittain H, Papandreou A, Meyer E, Ngoh A, et al. Improving diagnosis and broadening the phenotypes in early-onset seizure and severe developmental delay disorders through gene panel analysis. *J Med Genet*. 2016 May;53(5):310–7.
87. Truty R, Patil N, Sankar R, Sullivan J, Millichap J, Carvill G, et al. Possible precision medicine implications from genetic testing using combined detection of sequence and intragenic copy number variants in a large cohort with childhood epilepsy. *Epilepsia Open* [Internet]. [cited 2019 Jul 16];0(0). Available from: <https://onlinelibrary.wiley.com/doi/abs/10.1002/epi4.12348>
88. Tsai M-H, Chan C-K, Chang Y-C, Lin C-H, Liou C-W, Chang W-N, et al. Molecular Genetic Characterization of Patients With Focal Epilepsy Using a Customized Targeted Resequencing Gene Panel. *Front Neurol*. 2018 Jul 6;9:515.
89. Tsang MH-Y, Leung GK-C, Ho AC-C, Yeung K-S, Mak CC-Y, Pei SL-C, et al. Exome sequencing identifies molecular diagnosis in children with drug-resistant epilepsy. *Epilepsia Open*. 2019 Mar;4(1):63–72.

90. Tumiené B, Maver A, Writzl K, Hodžić A, Čaturilo G, Kuzmanić-Šamija R, et al. Diagnostic exome sequencing of syndromic epilepsy patients in clinical practice. *Clin Genet*. 2018 May;93(5):1057–62.
91. Vrijenhoek T, Middelburg EM, Monroe GR, van Gassen KLI, Geenen JW, Hövels AM, et al. Whole-exome sequencing in intellectual disability; cost before and after a diagnosis. *Eur J Hum Genet*. 2018 Nov;26(11):1566–71.
92. Wang J, Gotway G, Pascual JM, Park JY. Diagnostic Yield of Clinical Next-Generation Sequencing Panels for Epilepsy. *JAMA Neurol*. 2014 May 1;71(5):650.
93. Wang J, Wen Y, Zhang Q, Yu S, Chen Y, Wu X, et al. Gene mutational analysis in a cohort of Chinese children with unexplained epilepsy: Identification of a new KCND3 phenotype and novel genes causing Dravet syndrome. *Seizure*. 2019 Mar 1;66.
94. Wirrell EC, Shellhaas RA, Joshi C, Keator C, Kumar S, Mitchell WG, et al. How should children with West syndrome be efficiently and accurately investigated? Results from the National Infantile Spasms Consortium. *Epilepsia*. 2015 Apr;56(4):617–25.
95. Wu C-C, Tsai M-H, Chu Y-J, Weng W-C, Fan P-C, Lee W-T. The role of targeted gene panel in pediatric drug-resistant epilepsy. *Epilepsy Behav*. 2020 Mar 10;106:107003.
96. Xiao B, Qiu W, Ji X, Liu X, Huang Z, Liu H, et al. Marked yield of re-evaluating phenotype and exome/target sequencing data in 33 individuals with intellectual disabilities. *Am J Med Genet*. 2018 Jan;176(1):107–15.
97. Yamamoto T, Imaizumi T, Yamamoto-Shimajima K, Lu Y, Yanagishita T, Shimada S, et al. Genomic backgrounds of Japanese patients with undiagnosed neurodevelopmental disorders. *Brain Dev*. 2019 Jun 3;
98. Yang L, Kong Y, Dong X, Hu L, Lin Y, Chen X, et al. Clinical and genetic spectrum of a large cohort of children with epilepsy in China. *Genet Med*. 2019 Mar;21(3):564–71.
99. Yokoi T, Enomoto Y, Tsurusaki Y, Harada N, Saito T, Nagai J-I, et al. An efficient genetic test flow for multiple congenital anomaly and intellectual disability. *Pediatr Int*. 2020 Jan 18;
100. Zhang Q, Li J, Zhao Y, Bao X, Wei L, Wang J. Gene mutation analysis of 175 Chinese patients with early-onset epileptic encephalopathy: Gene mutation analysis of Chinese patients with EOEEs. *Clin Genet*. 2017 May;91(5):717–24.
101. Zhang Y, Kong W, Gao Y, Liu X, Gao K, Xie H, et al. Gene Mutation Analysis in 253 Chinese Children with Unexplained Epilepsy and Intellectual/Developmental Disabilities. Shapiro MS, editor. *PLoS ONE*. 2015 Nov 6;10(11):e0141782.
102. Zhou P, He N, Zhang J-W, Lin Z-J, Wang J, Yan L-M, et al. Novel mutations and phenotypes of epilepsy-associated genes in epileptic encephalopathies. *Genes, Brain and Behavior*. 2018 Nov;17(8):e12456.
103. Zhou W-Z, Zhang J, Li Z, Lin X, Li J, Wang S, et al. Targeted resequencing of 358 candidate genes for autism spectrum disorder in a Chinese cohort reveals diagnostic potential and genotype-phenotype correlations. *Hum Mutat*. 2019 Jun;40(6):801–15.
